# Supplementary material for: A co-culture genome-wide RNAi screen with mammary epithelial cells reveals transmembrane signals required for growth and differentiation
Source: Springer Nature journal article supplement (doi:10.1186/s13058-014-0510-y), 2015-01-08

**RIPK2 (ILMN\_1758939)**

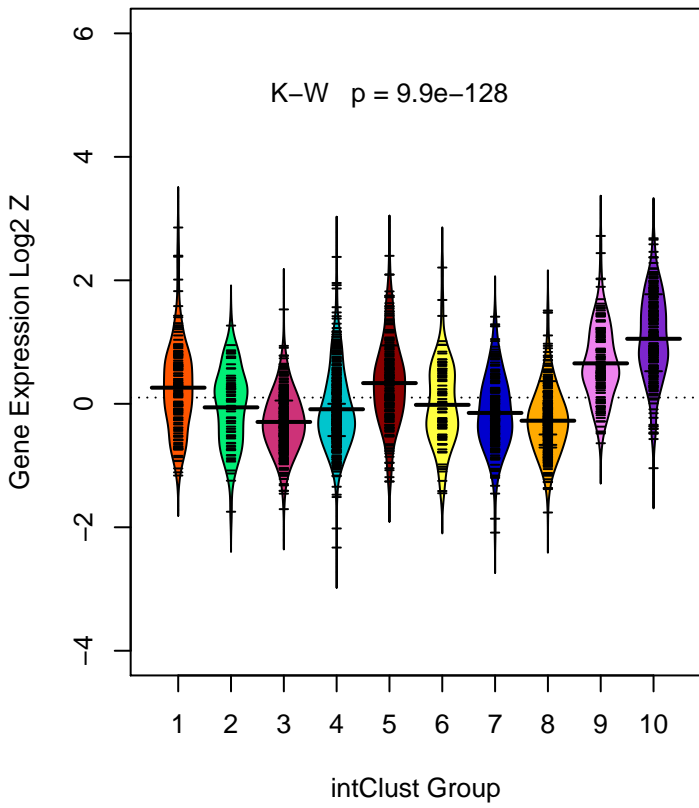

**TUFT1 (ILMN\_1781374)**

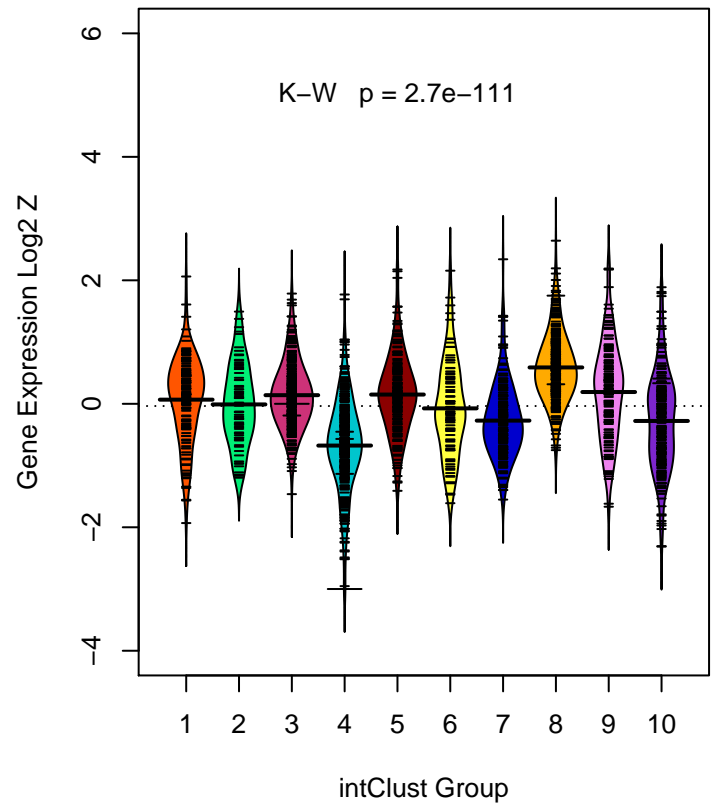

**EFNA4 (ILMN\_1755710)**

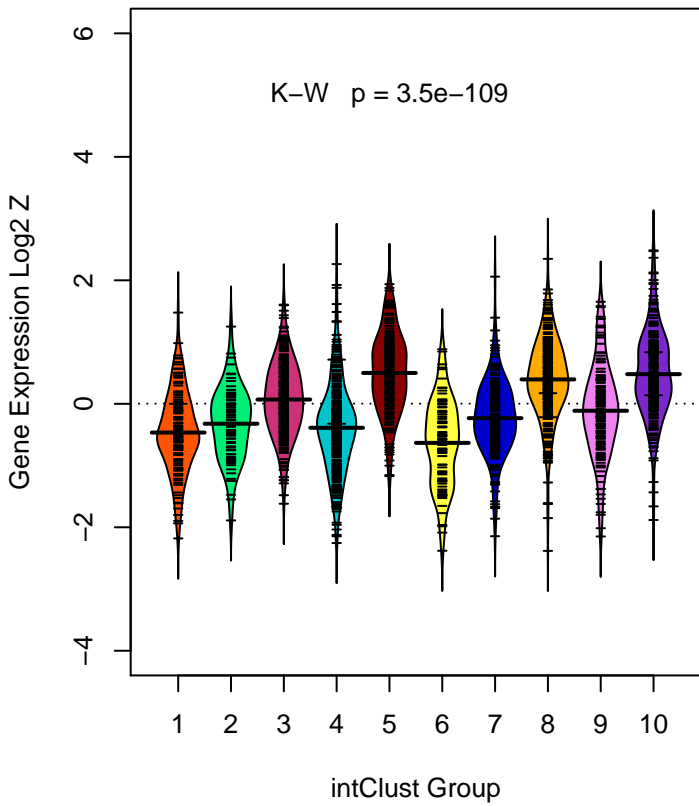

**TMEM9B (ILMN\_2100815)**

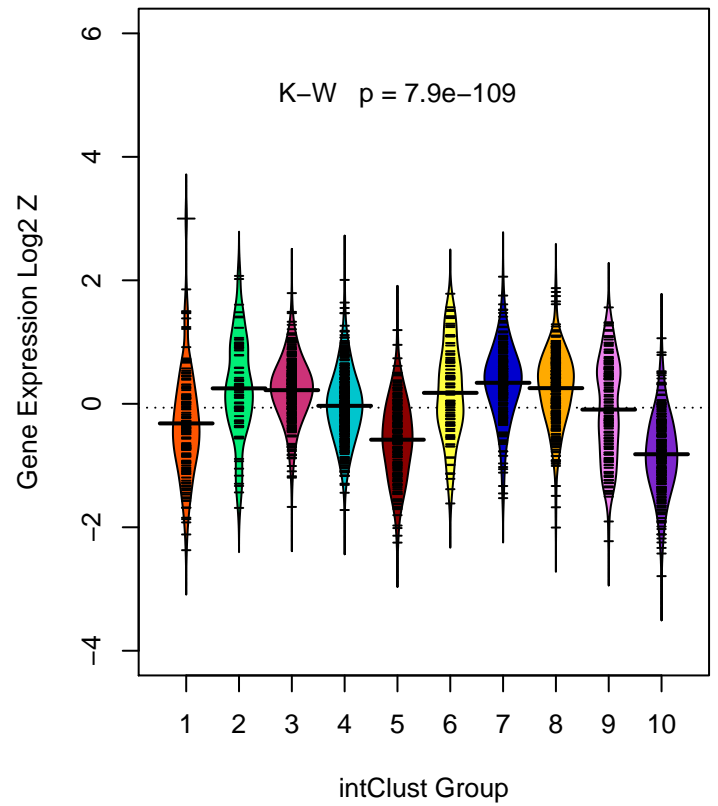

**HSD17B2 ( ILMN\_1808713 )**

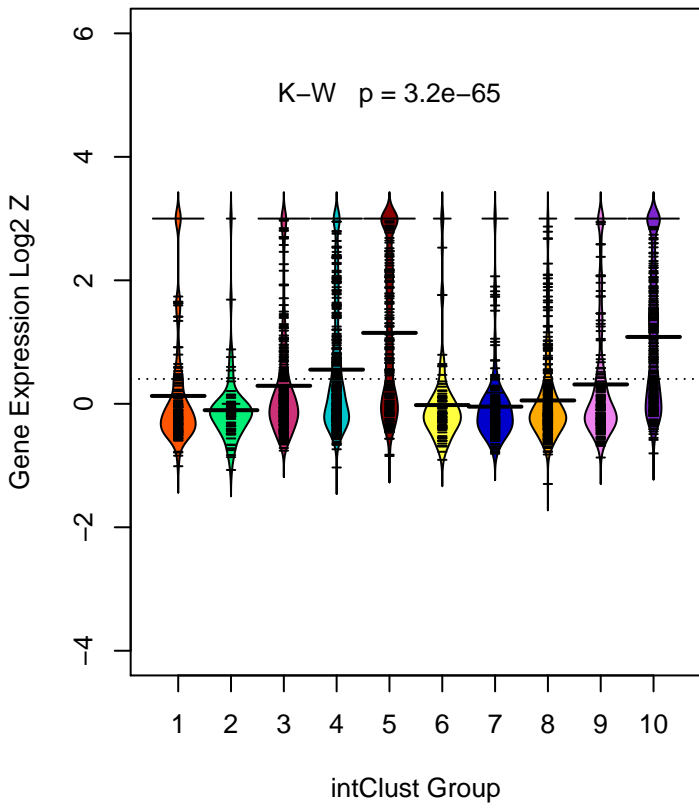

**ACE2 ( ILMN\_1667018 )**

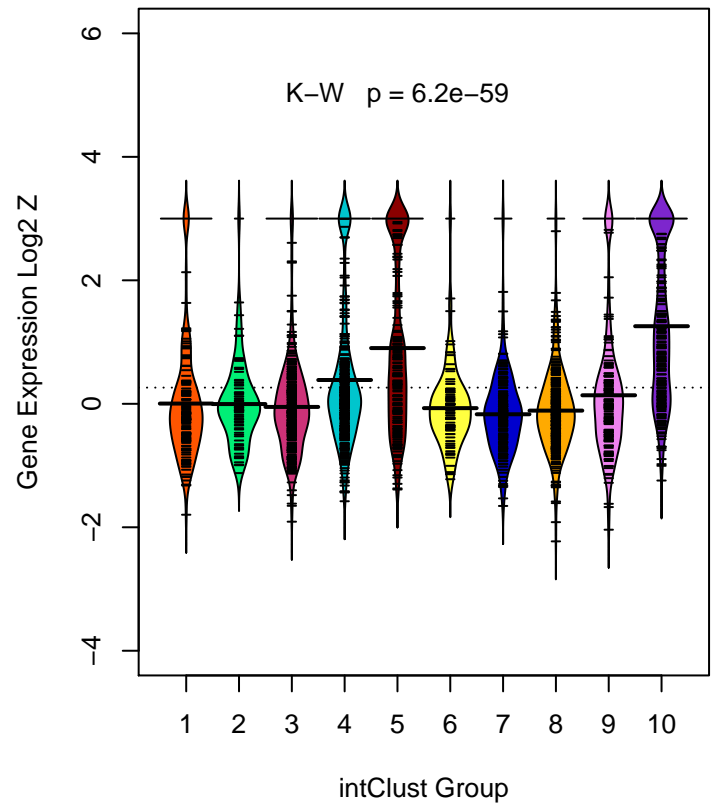

**SERPINH1 ( ILMN\_1751028 )**

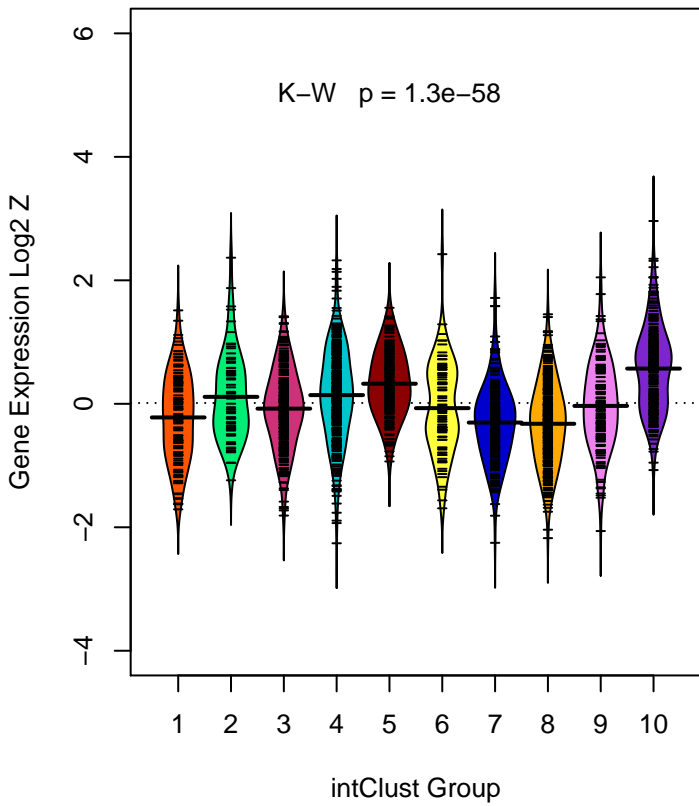

**CD79A ( ILMN\_1734878 )**

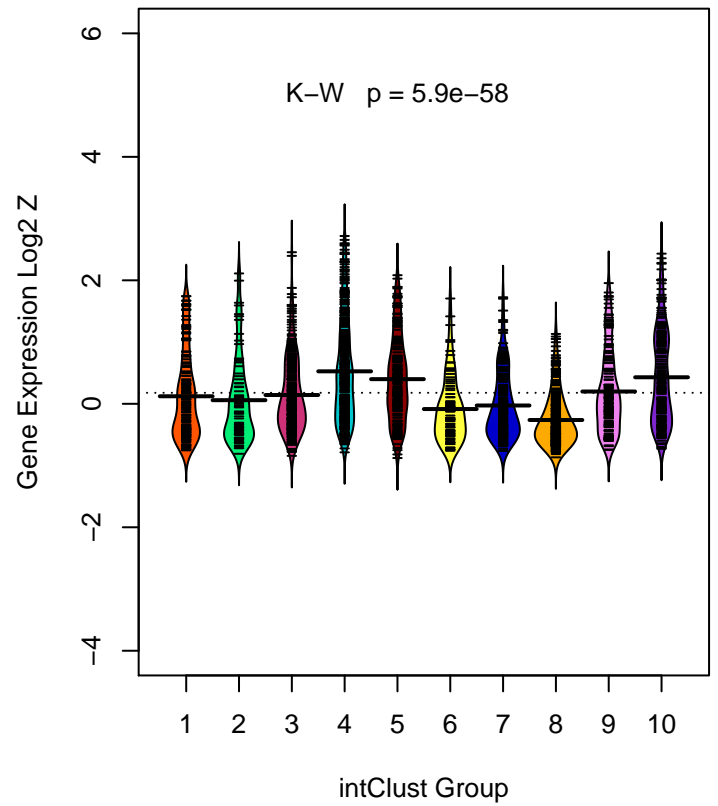

**ADCY4 (ILMN\_2148944)**

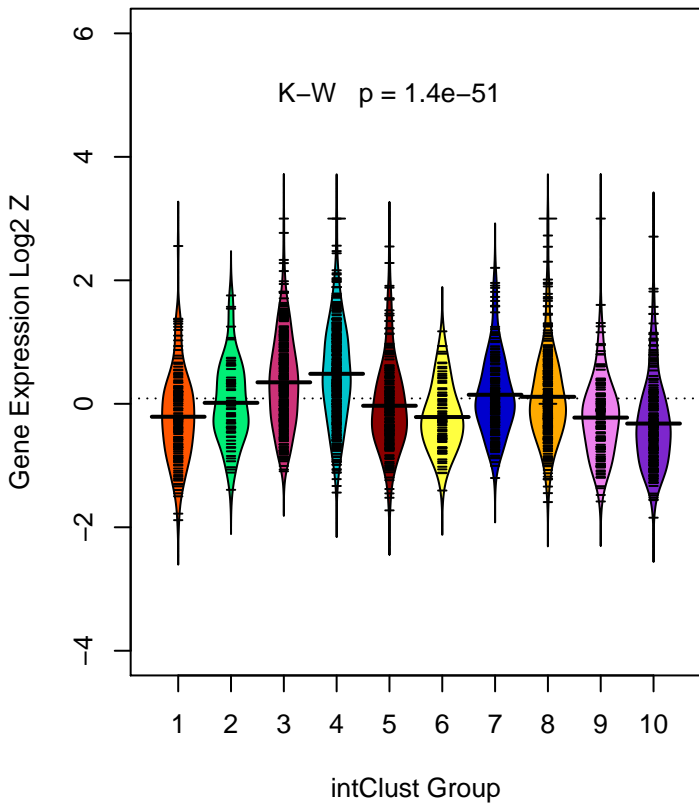

**ROBO3 (ILMN\_1731561)**

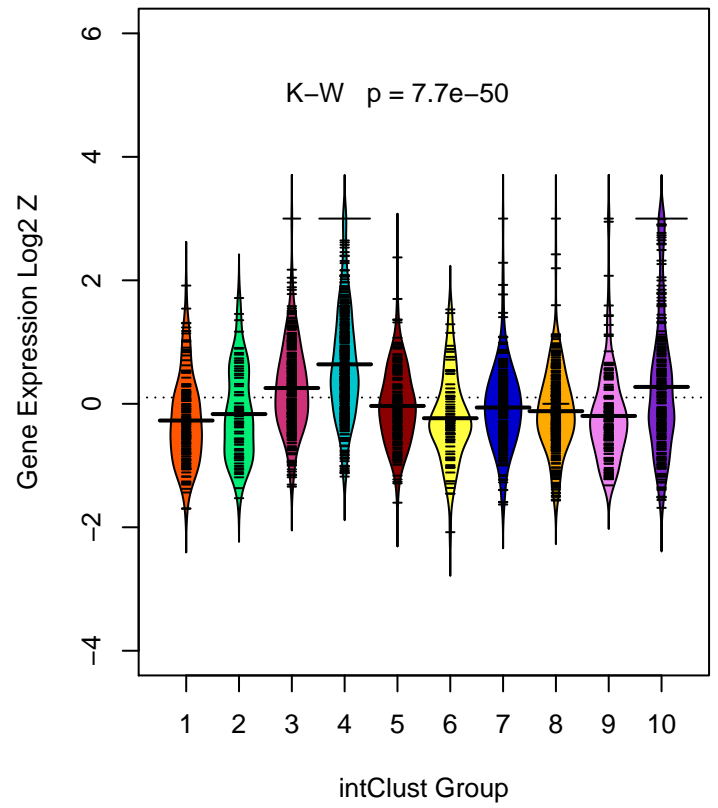

**SEMA3C (ILMN\_1695475)**

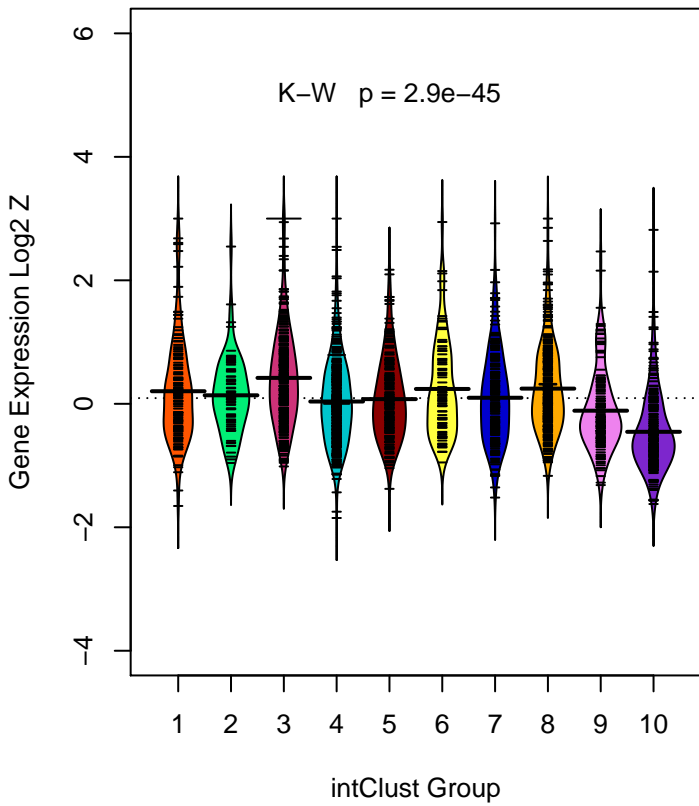

**SLC7A7 (ILMN\_1810275)**

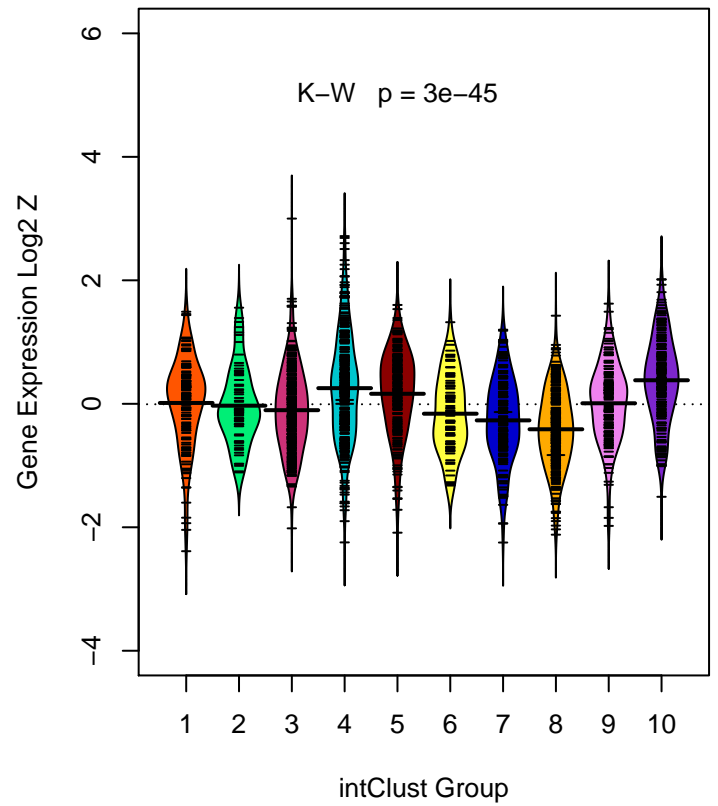

**CTNNA1 (ILMN\_1804854)**

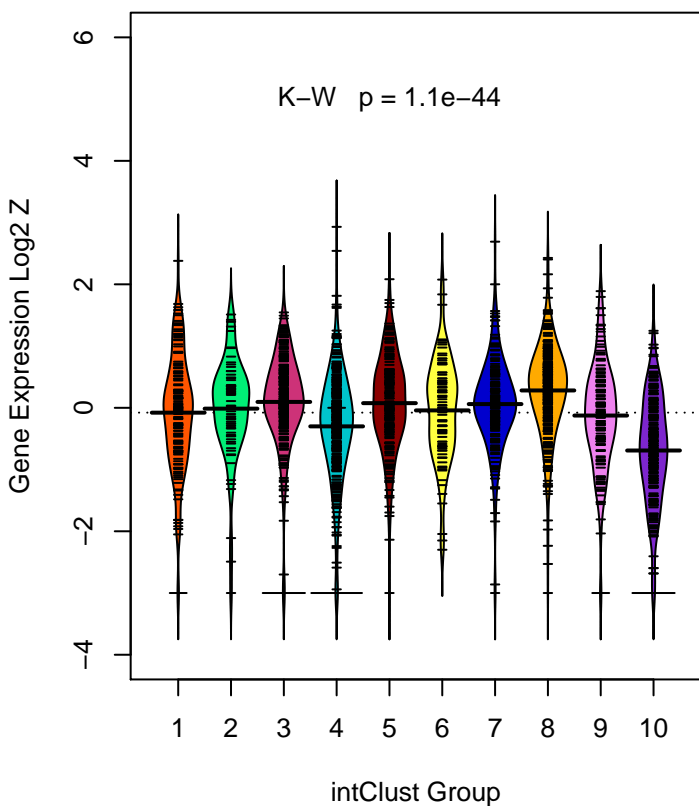

**SCARB2 (ILMN\_1814726)**

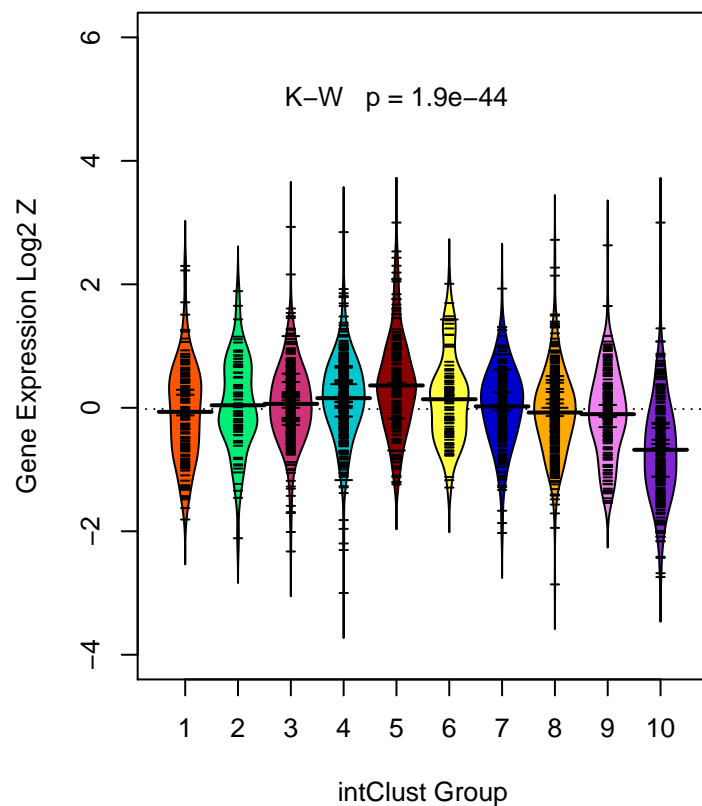

**PDCD1 (ILMN\_1806725)**

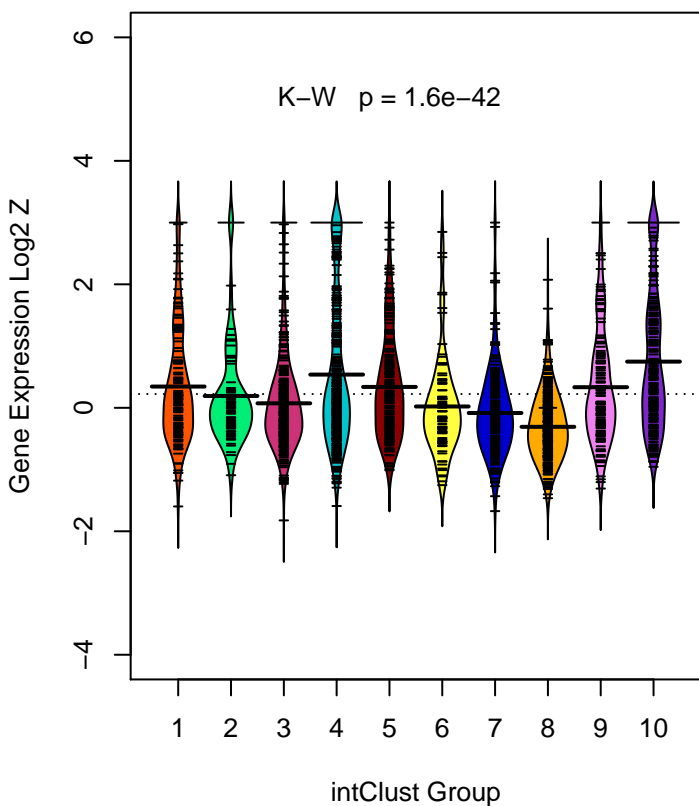

**FIT1 (ILMN\_1764557)**

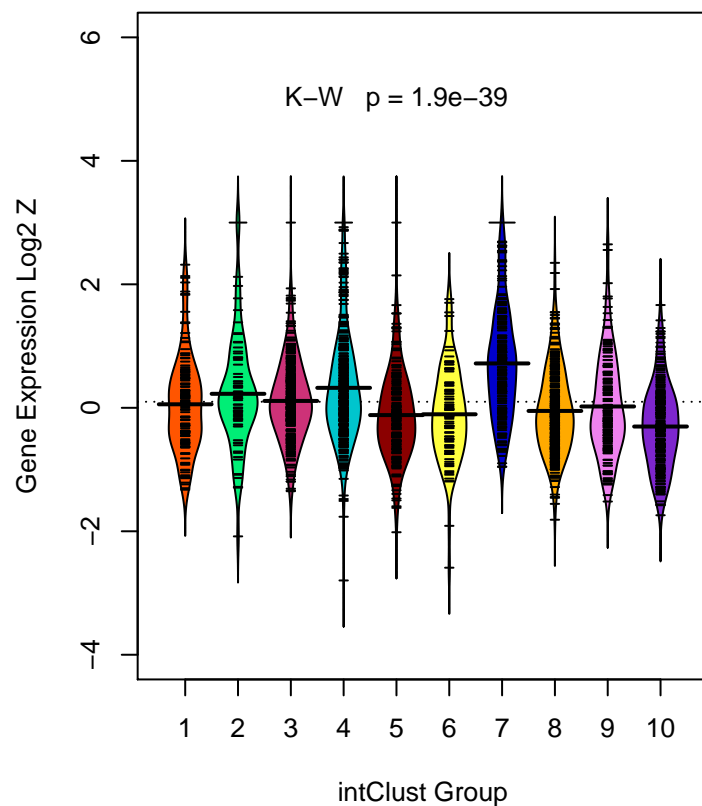

**SLC6A4 ( ILMN\_1683694 )**

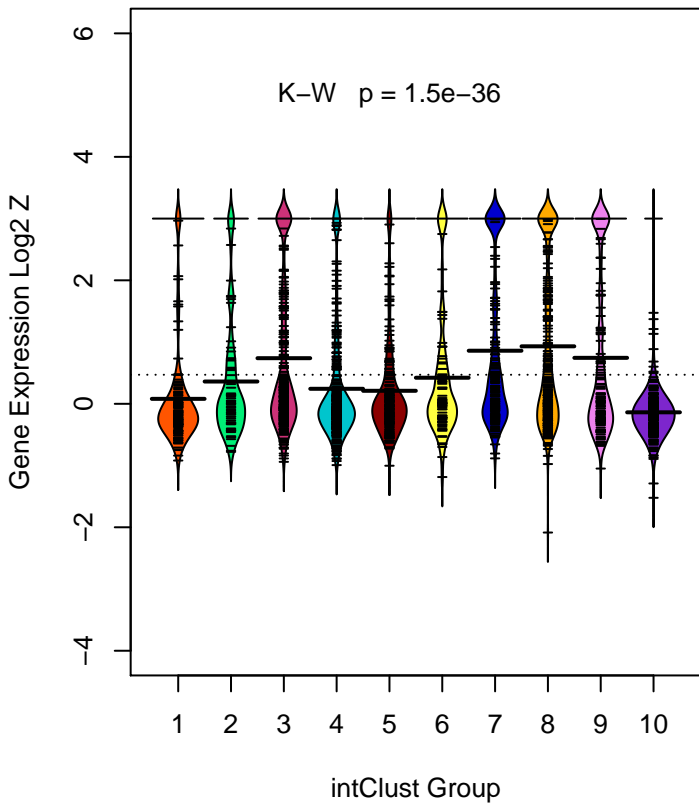

**PROCR ( ILMN\_1717262 )**

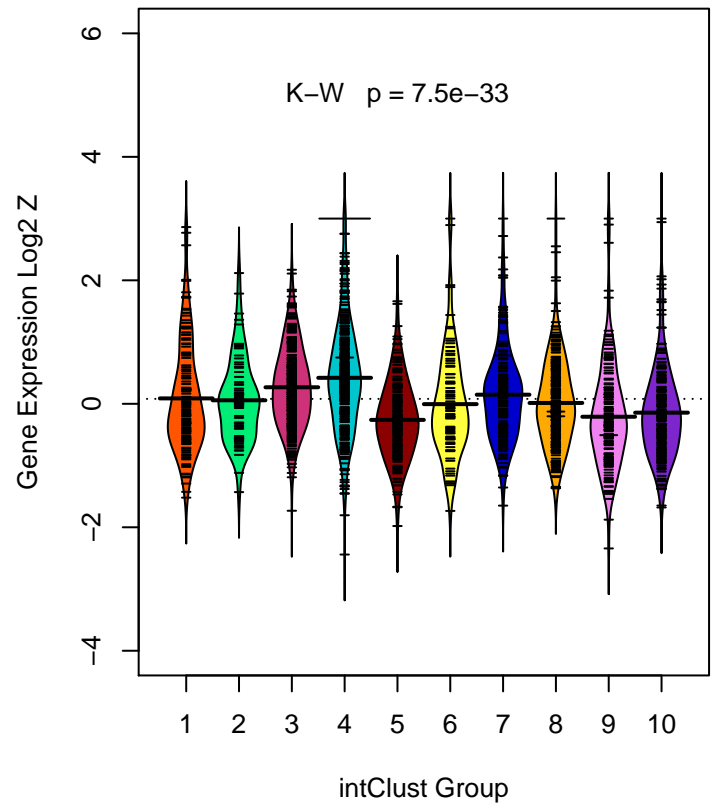

**OPRS1 ( ILMN\_1717925 )**

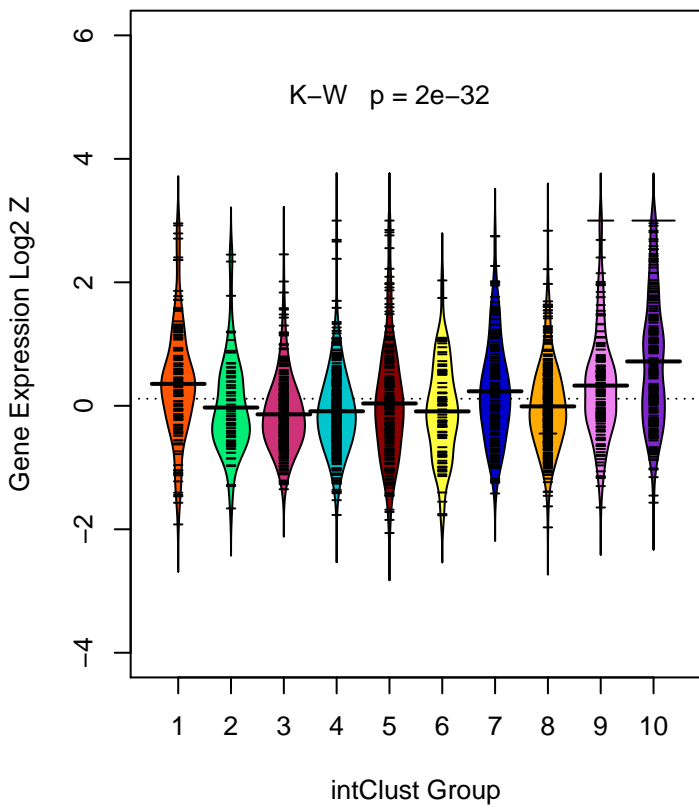

**SAA1 ( ILMN\_1701017 )**

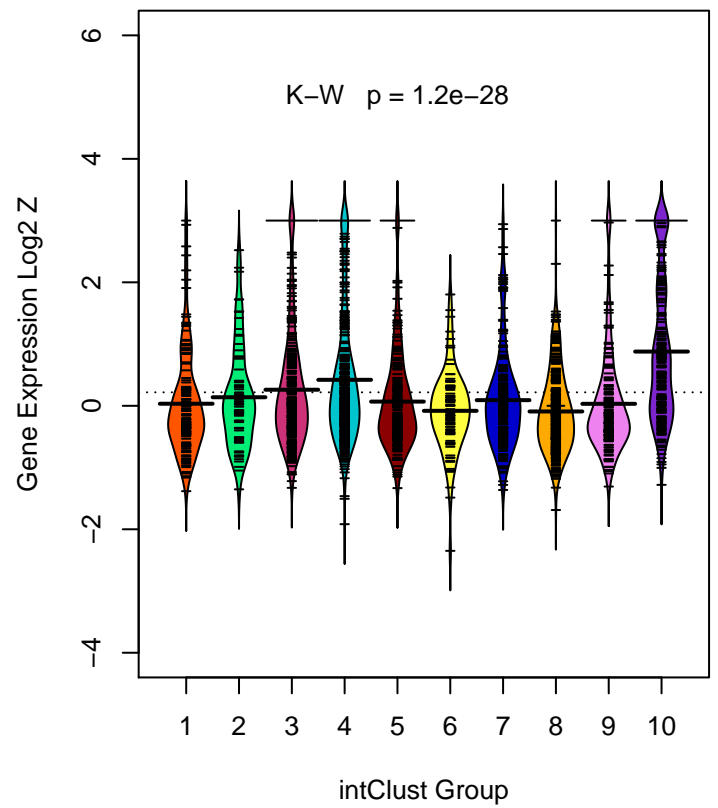

**KTELC1 (ILMN\_1811104)**

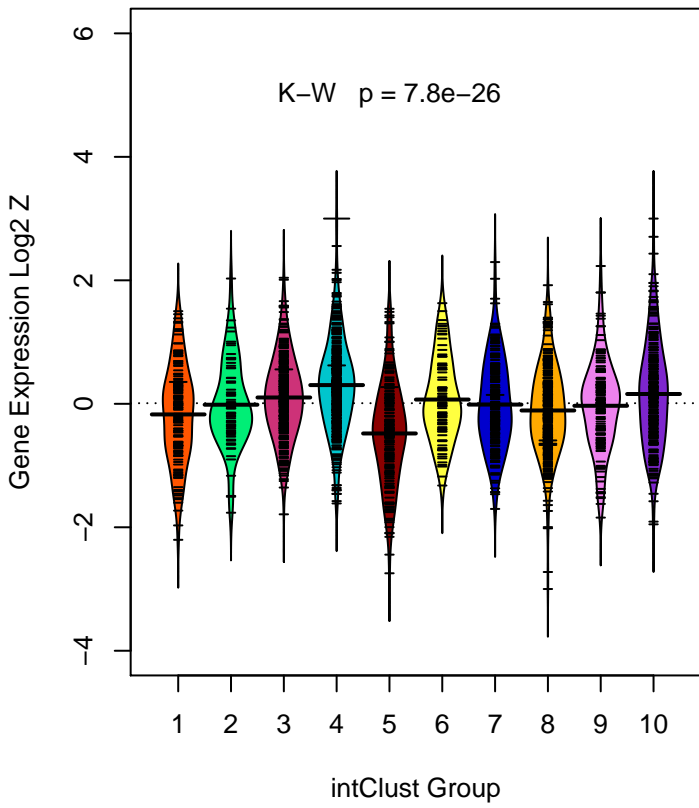

**MMP28 (ILMN\_1752952)**

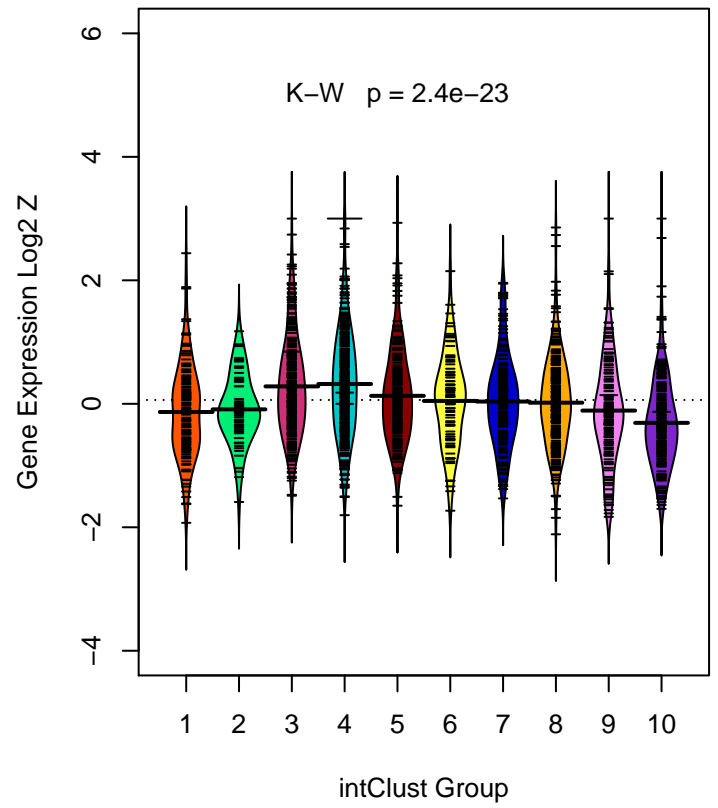

**GPR80 (ILMN\_1709091)**

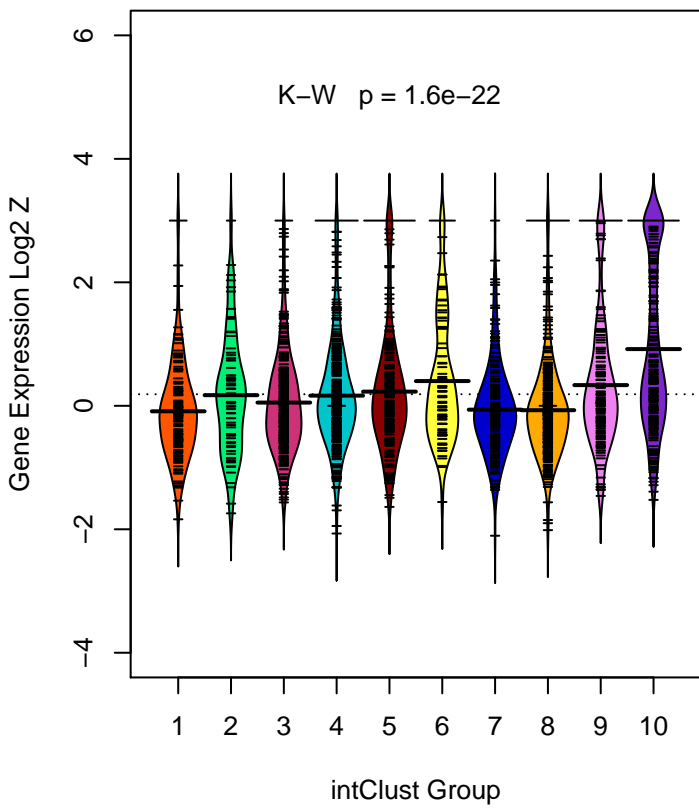

**COL9A3 (ILMN\_1740155)**

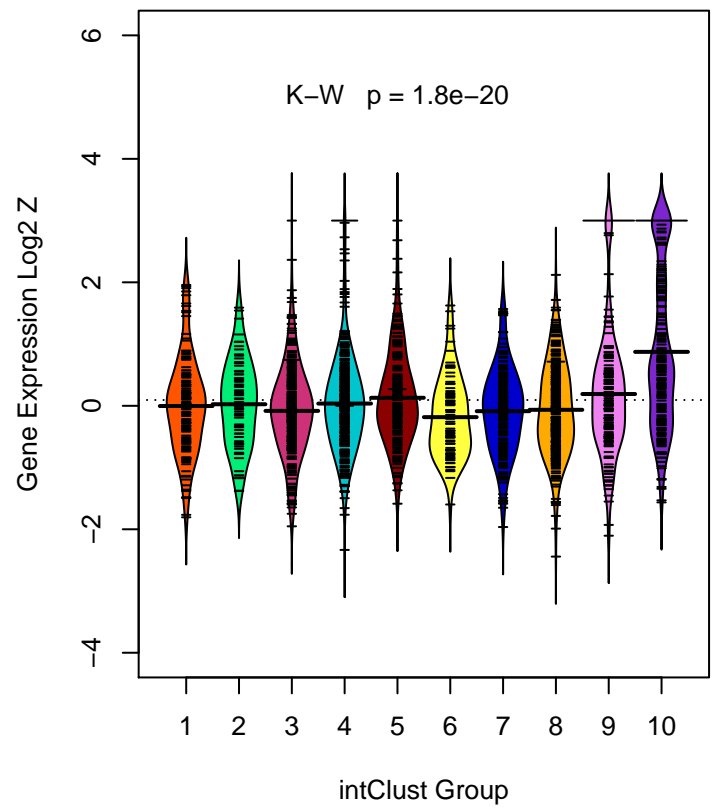

**LPAR3 (ILMN\_1709719)**

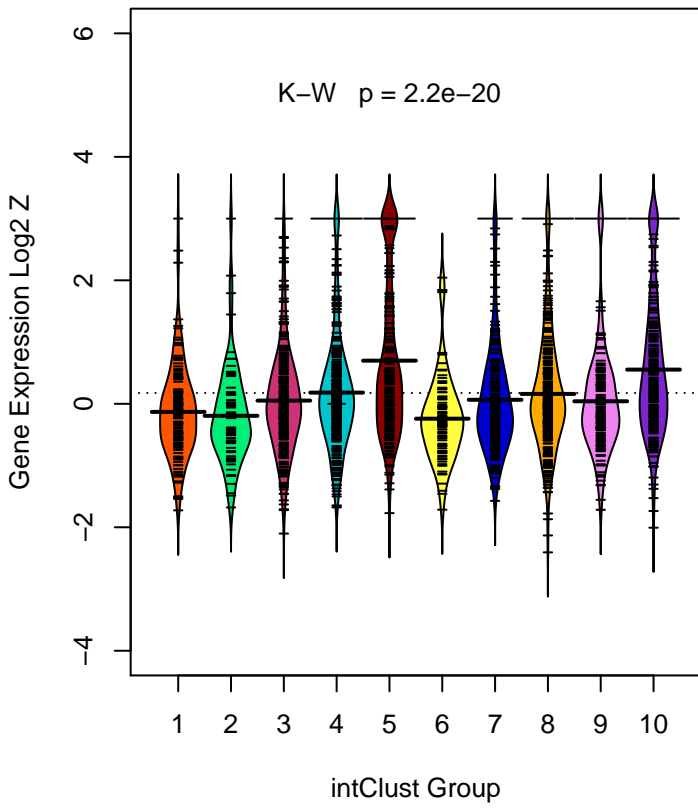

**BDKRB2 (ILMN\_1684086)**

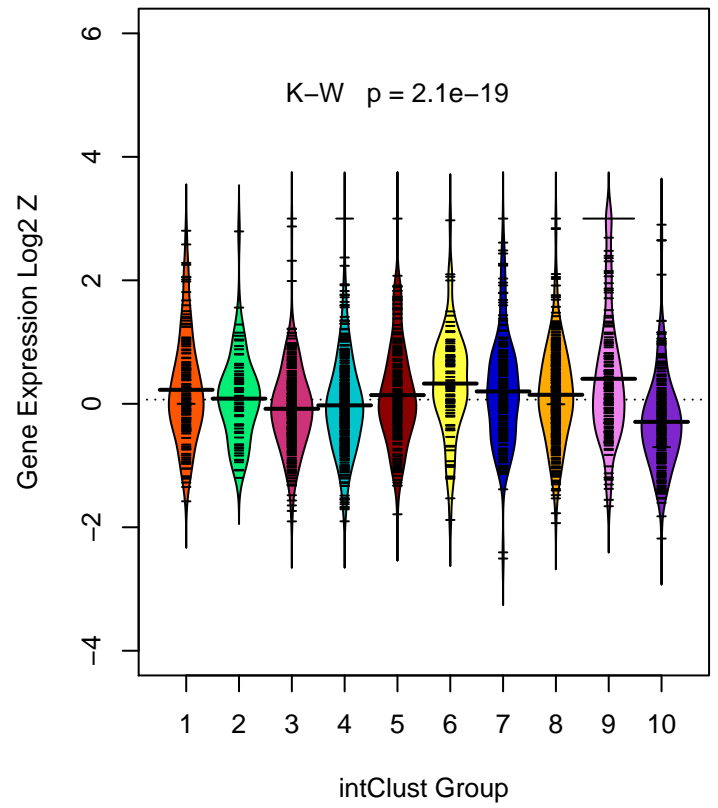

**FLOT2 (ILMN\_1726222)**

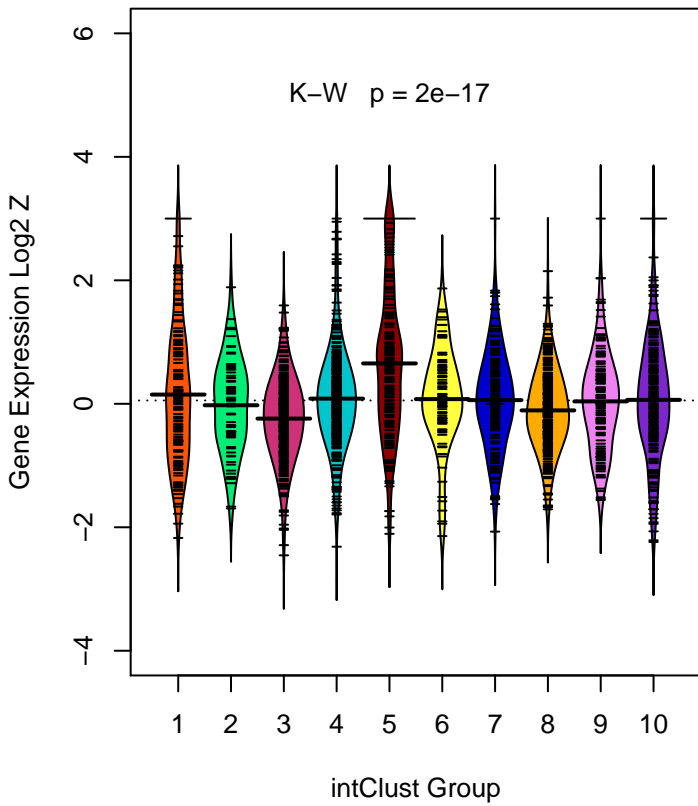

**TMEM14C (ILMN\_2175131)**

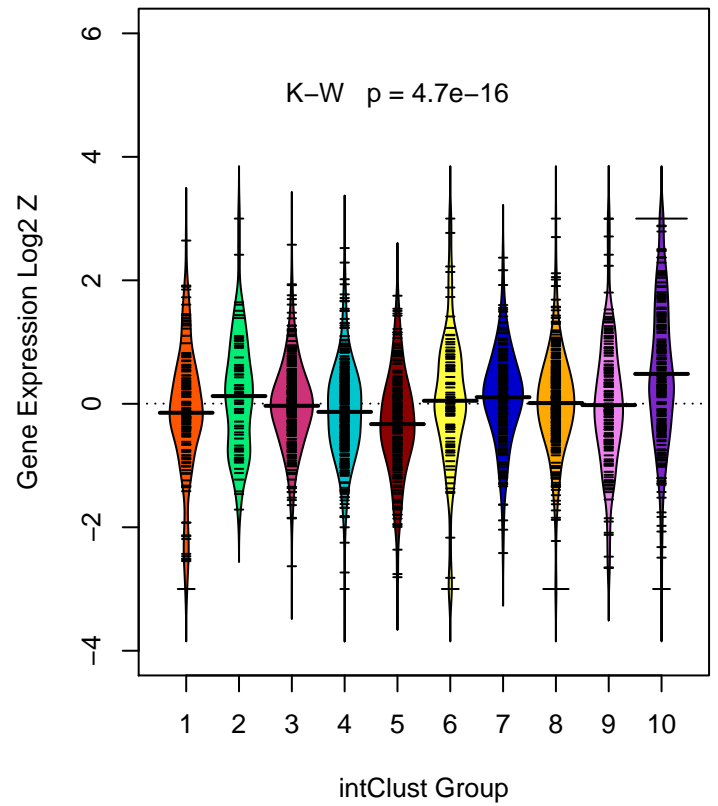

**PCDHB13 ( ILMN\_1766950 )**

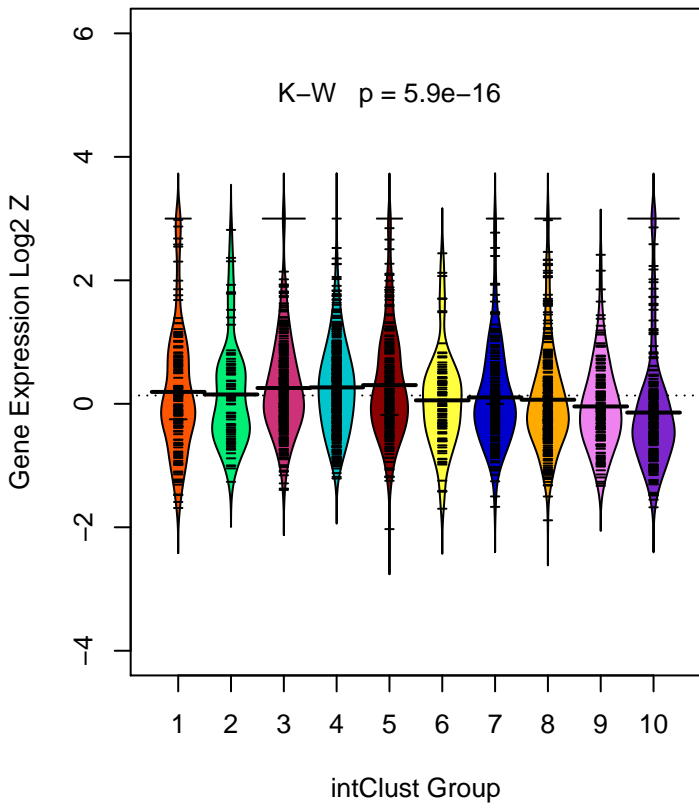

**BST1 ( ILMN\_1770161 )**

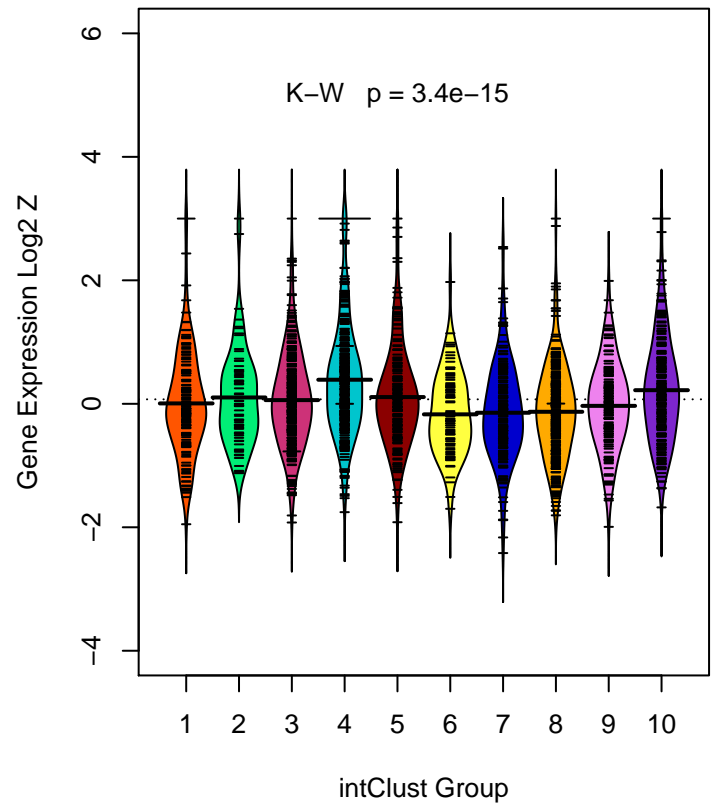

**SNN ( ILMN\_1788251 )**

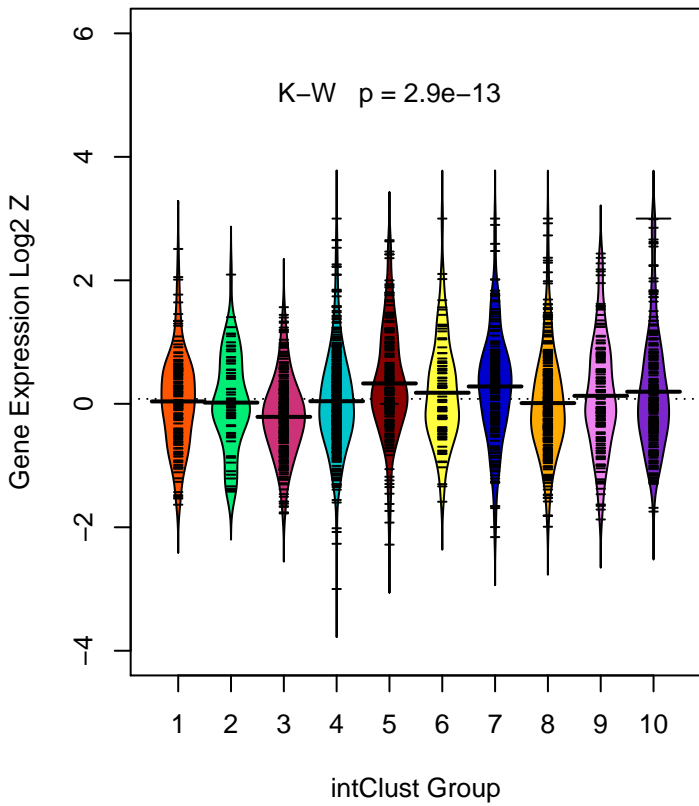

**FZD2 ( ILMN\_1653711 )**

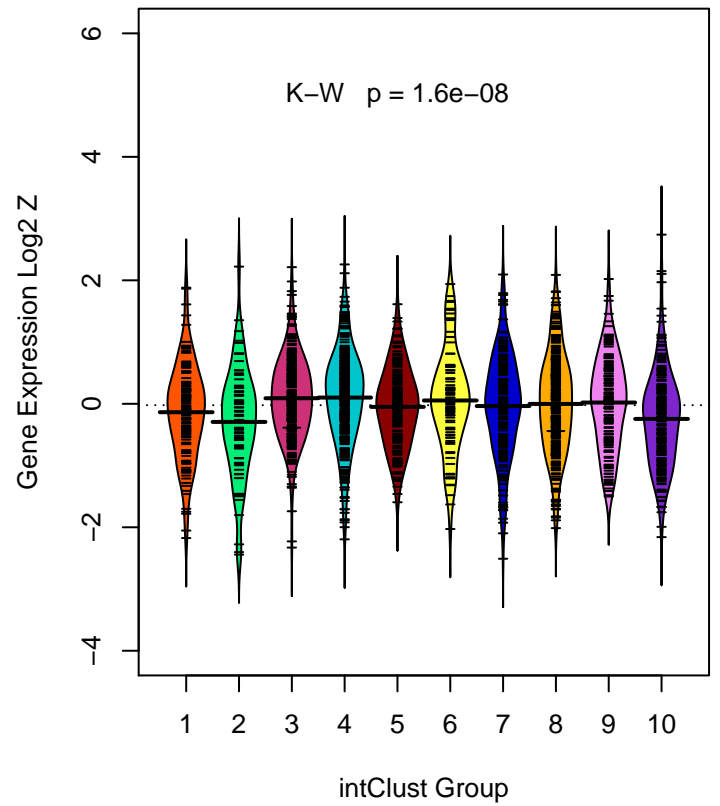



**PARD3 (ILMN\_1710524)**

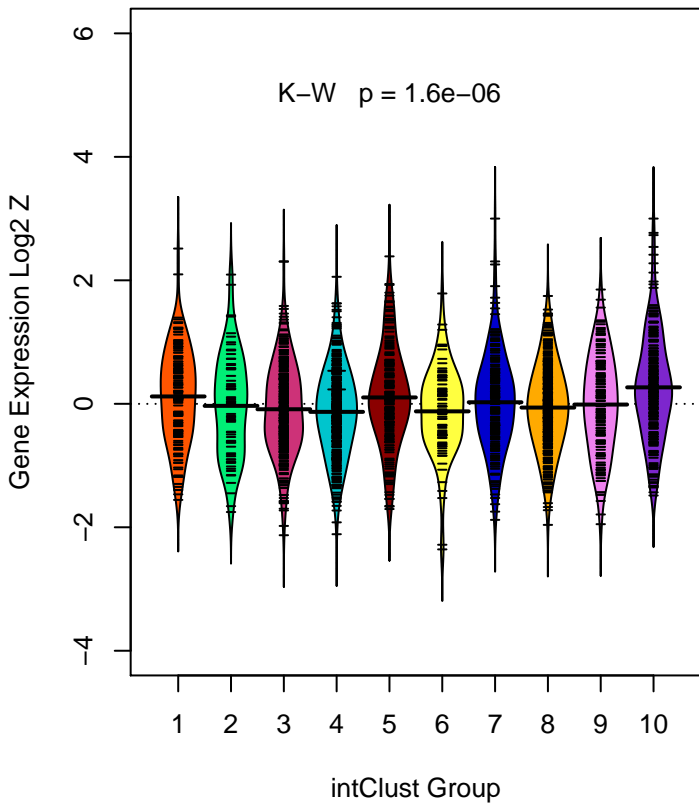

**NPTX1 (ILMN\_1814221)**

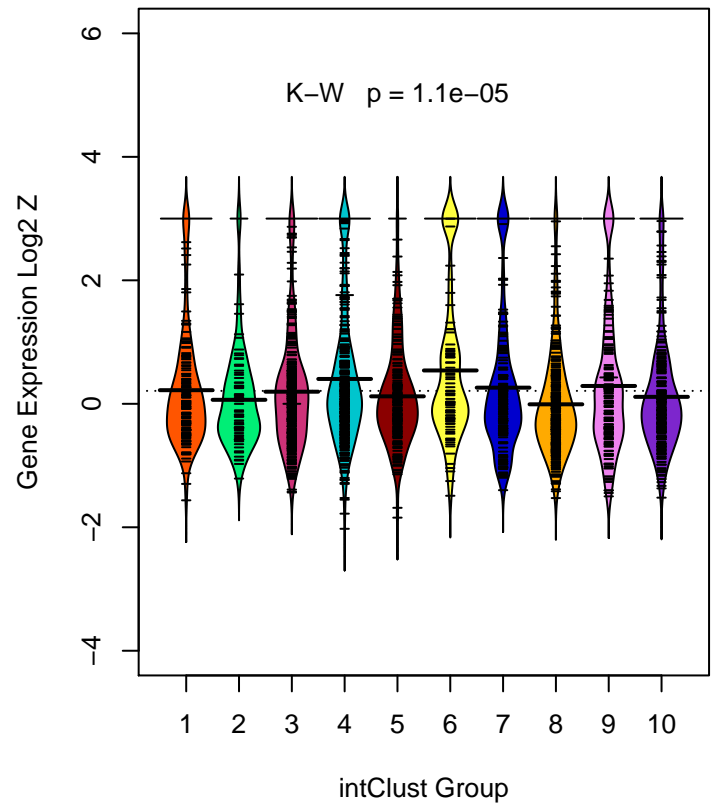

**LGALS1 (ILMN\_1723978)**

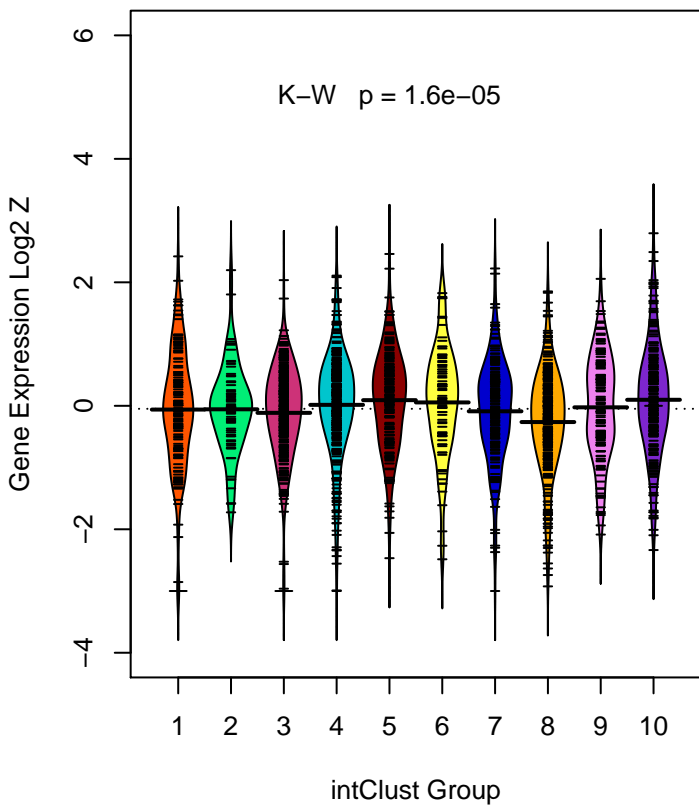

**PLA2G2F (ILMN\_1724799)**

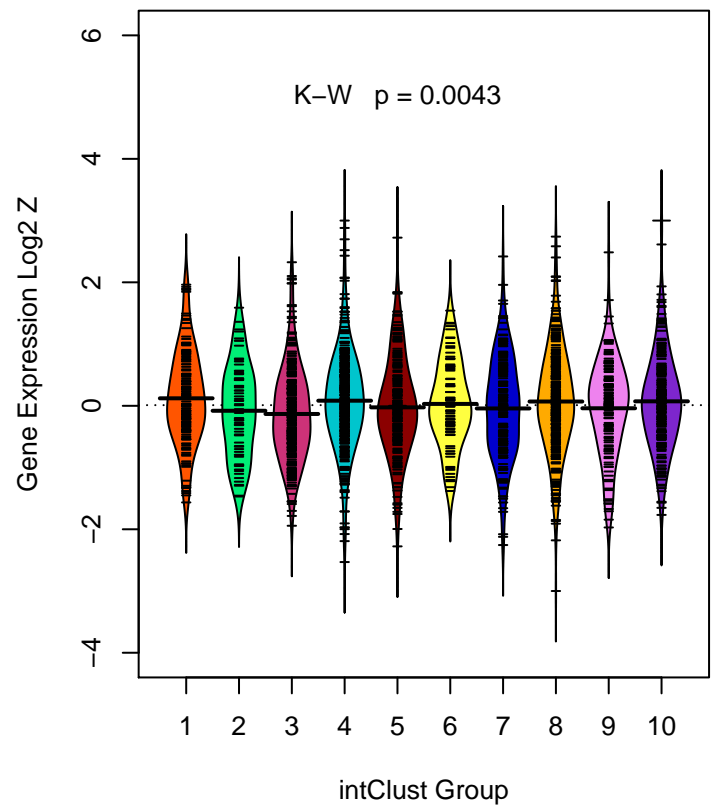

**LTBP3 (ILMN\_1777121)**

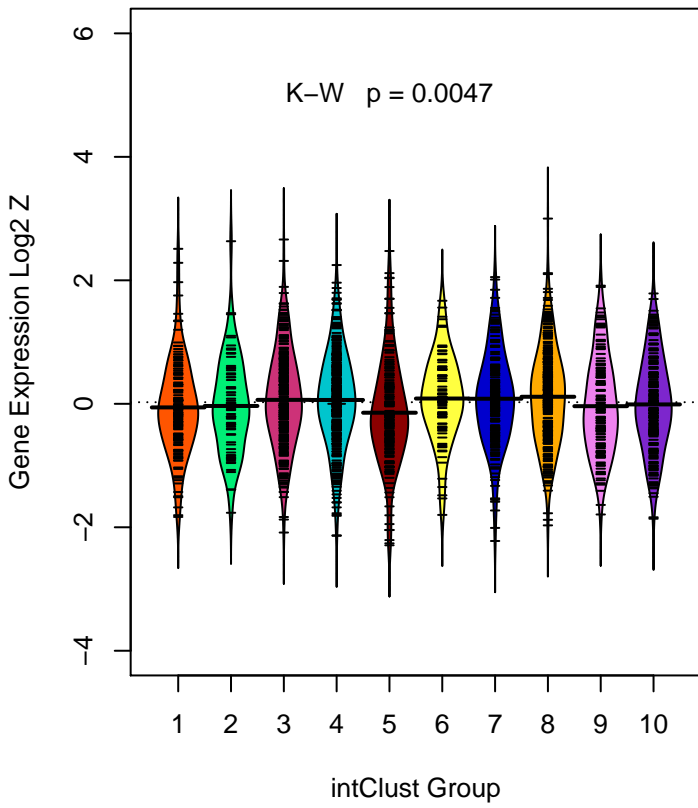

**RHCE (ILMN\_2408663)**

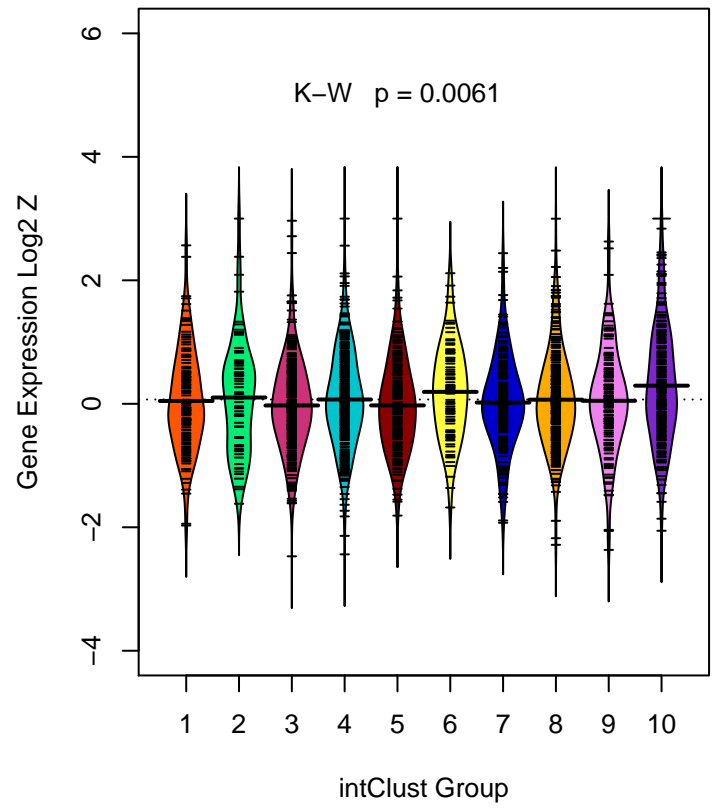

**MMP24 (ILMN\_1778333)**

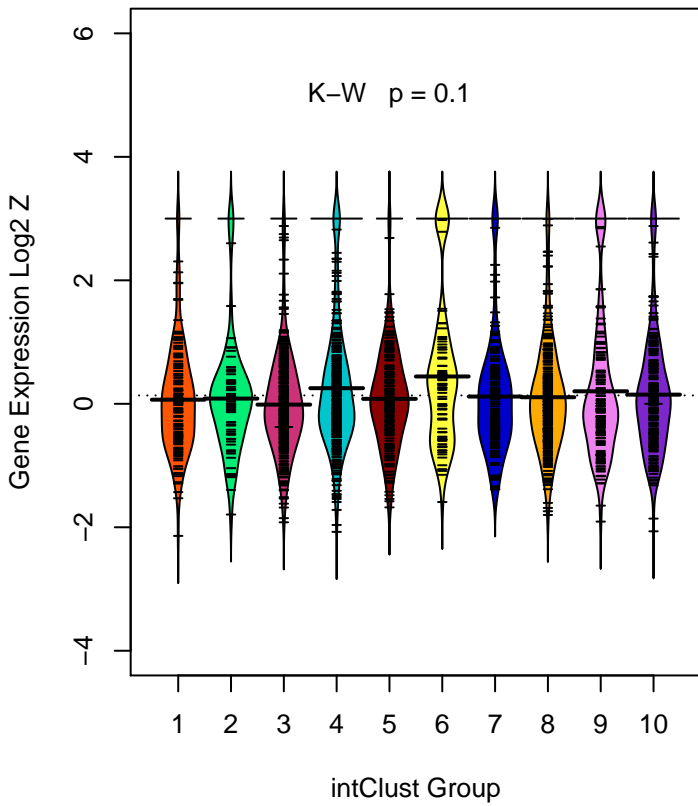

**NTN1 (ILMN\_1692927)**

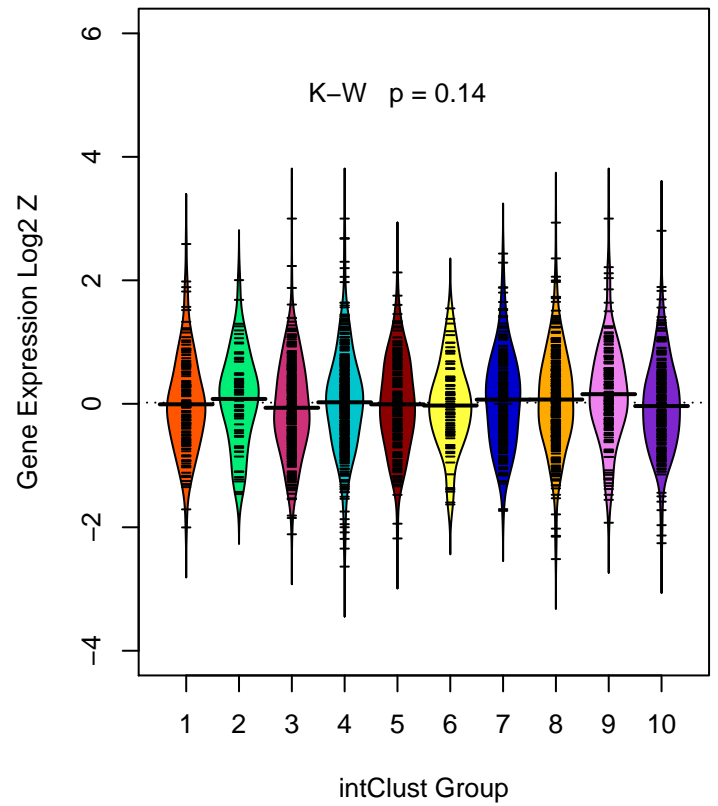

**NTN2L (ILMN\_1656040)**

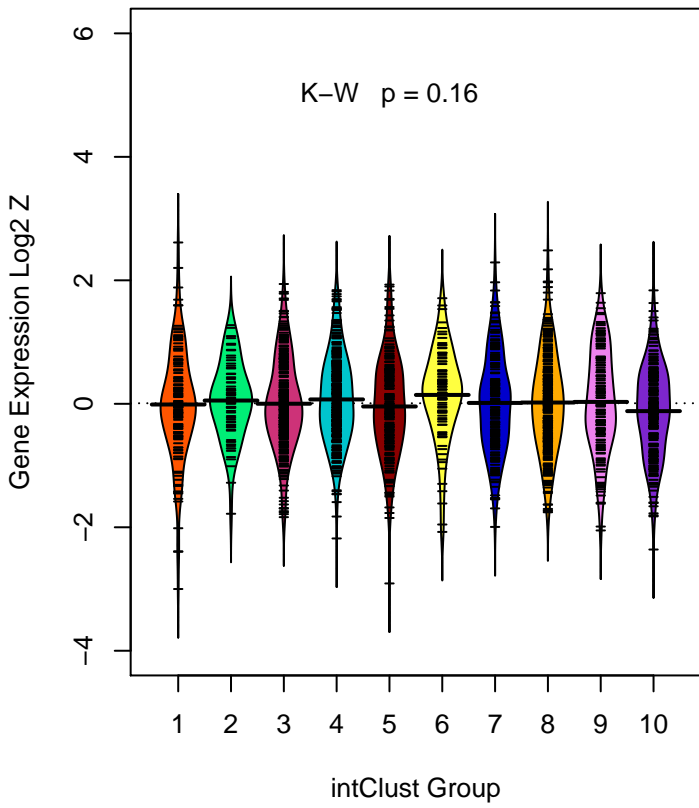

**GPR39 (ILMN\_1688768)**

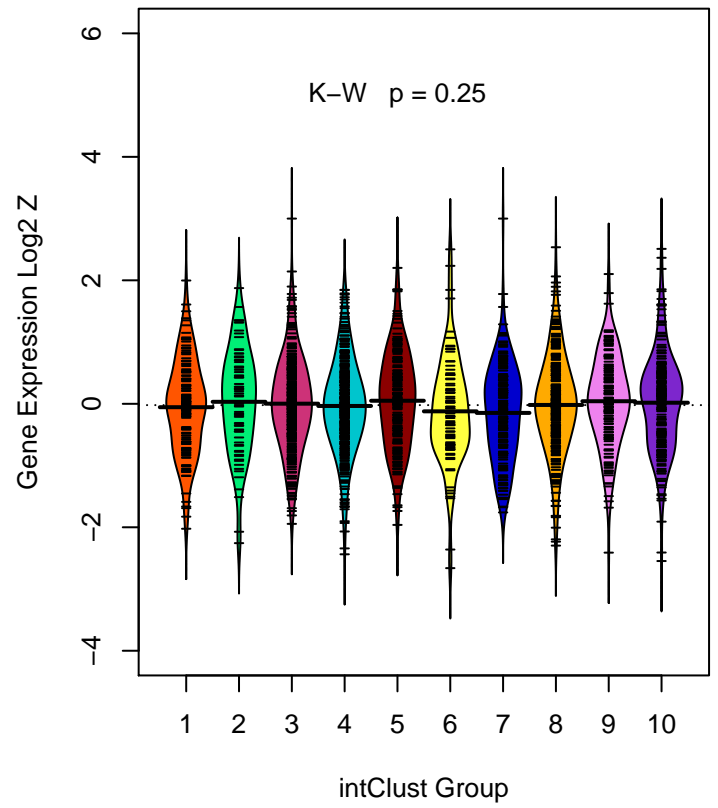

**KCNJ5 (ILMN\_2137312)**

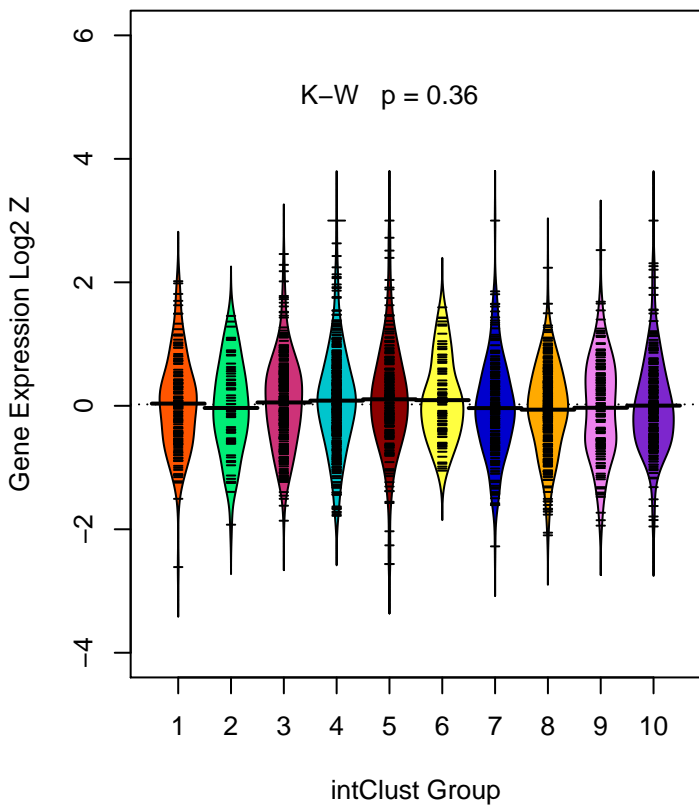

**PLUNC (ILMN\_1774250)**

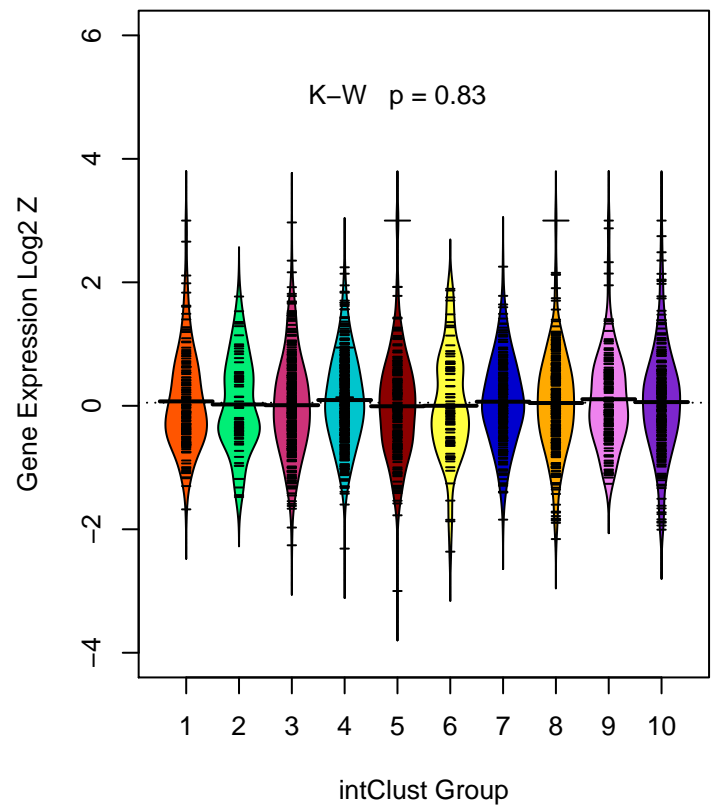

GPR182 ( ILMN\_1696810 )

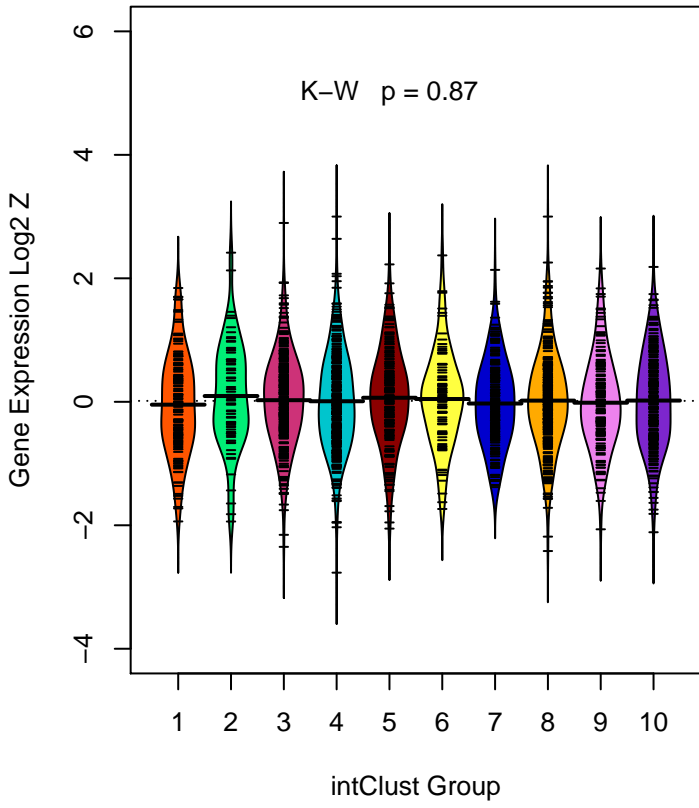

NKAIN4 ( ILMN\_1813639 )

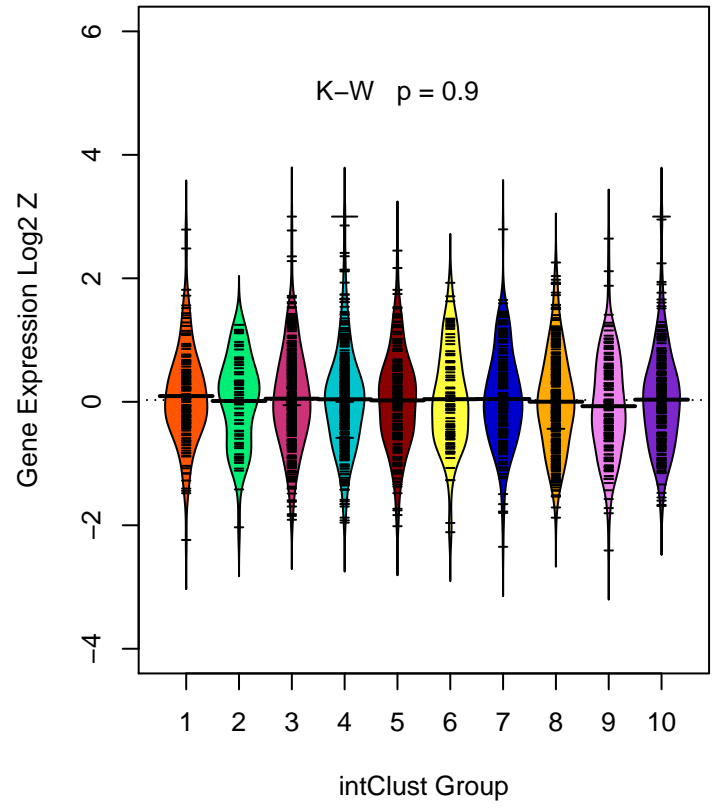

Supplement: MOESM12 [file 9781318]
