# Supplementary material for: A co-culture genome-wide RNAi screen with mammary epithelial cells reveals transmembrane signals required for growth and differentiation
Source: Springer Nature journal article supplement (doi:10.1186/s13058-014-0510-y), 2015-01-08

**RIPK2 (ILMN\_1758939)**

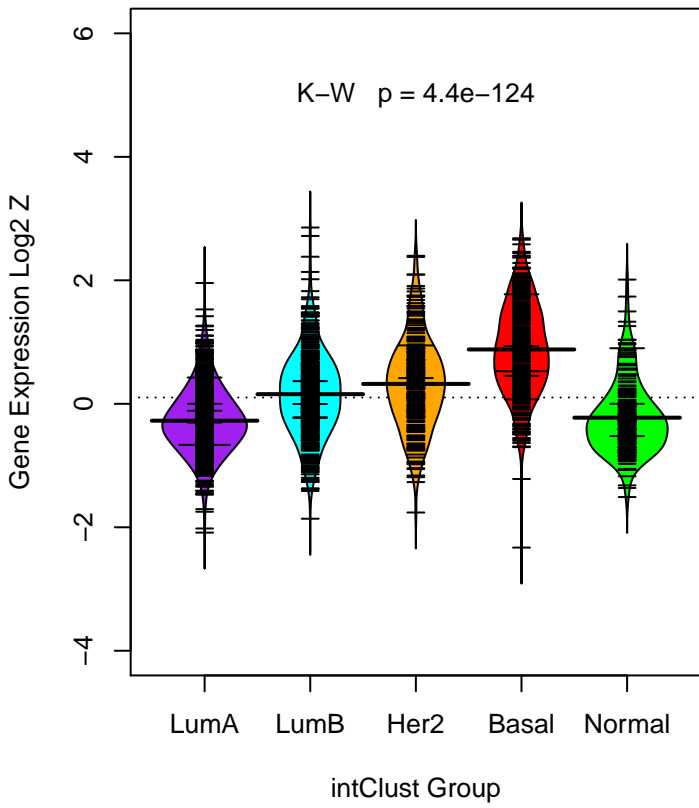

**TMEM9B (ILMN\_2100815)**

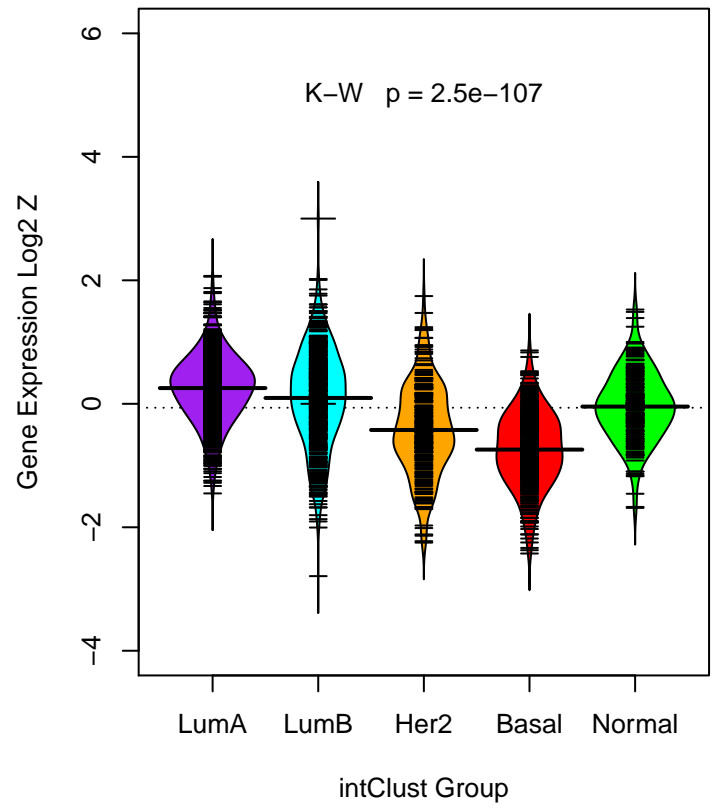

**HSD17B2 (ILMN\_1808713)**

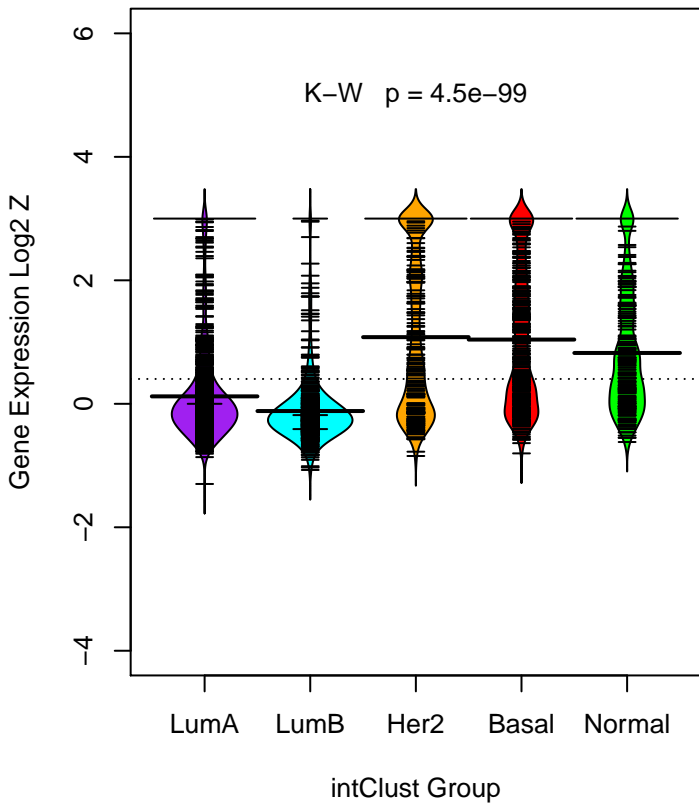

**ACE2 (ILMN\_1667018)**

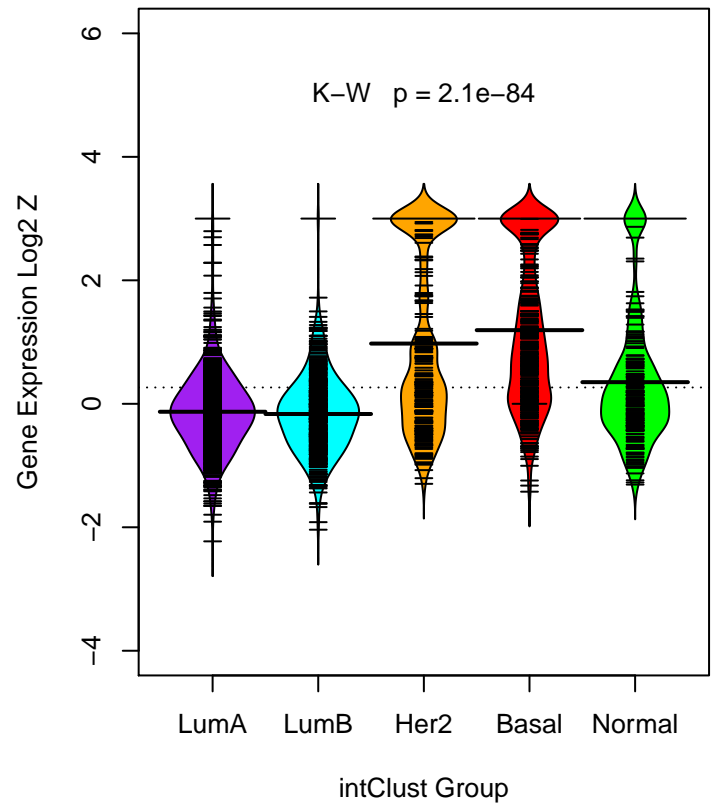

**ROBO3 ( ILMN\_1731561 )**

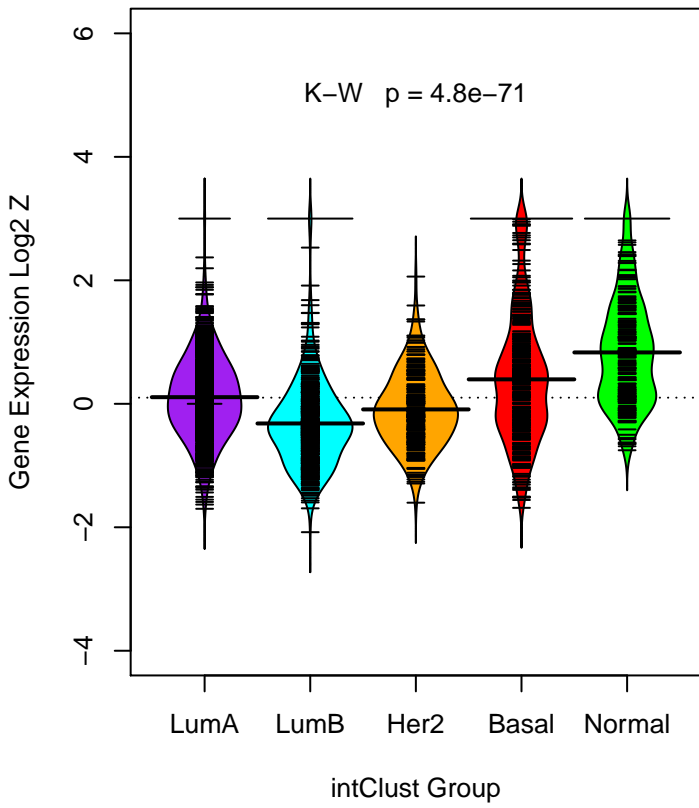

**SERPINH1 ( ILMN\_1751028 )**

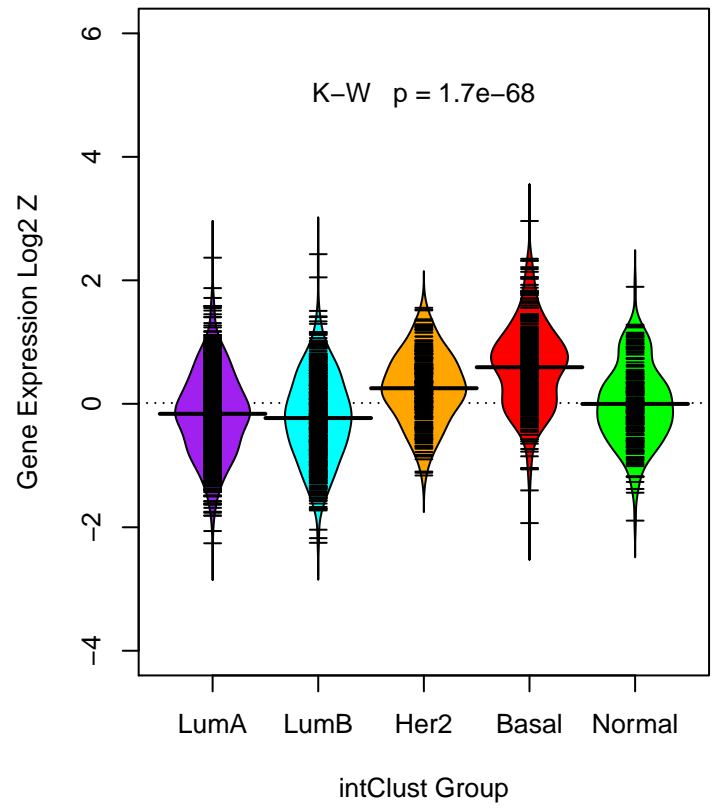

**ADCY4 ( ILMN\_2148944 )**

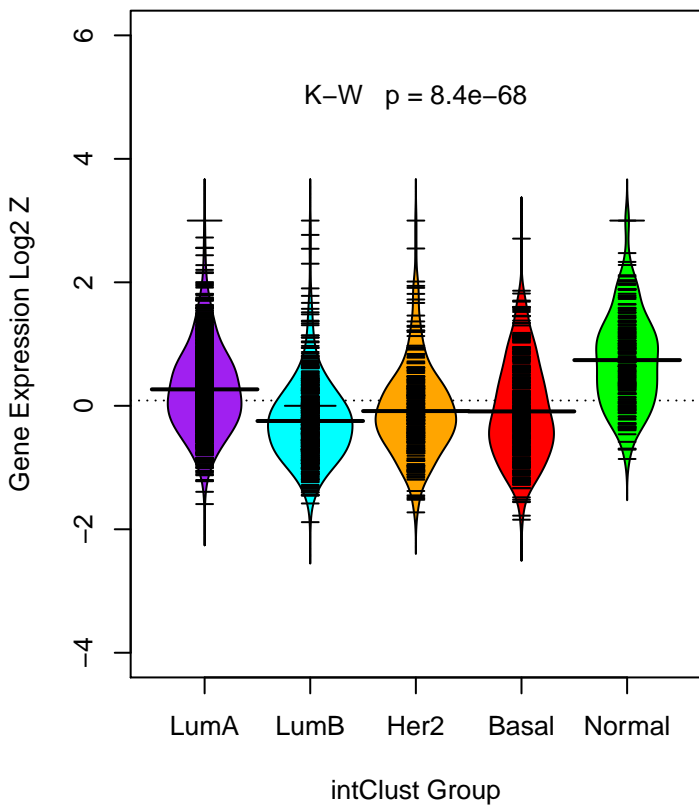

**CTNNA1 ( ILMN\_2230902 )**

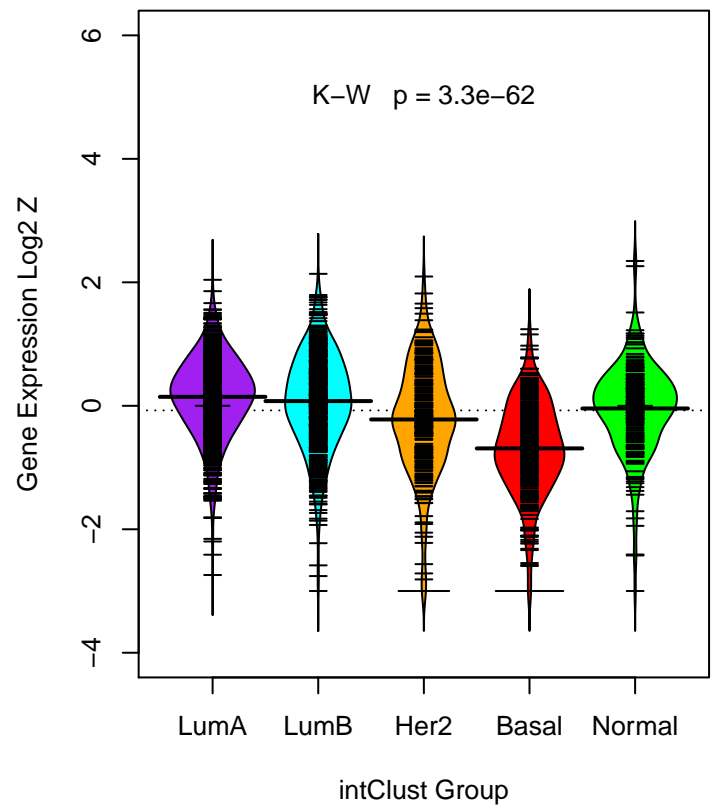

**SLC7A7 ( ILMN\_1810275 )**

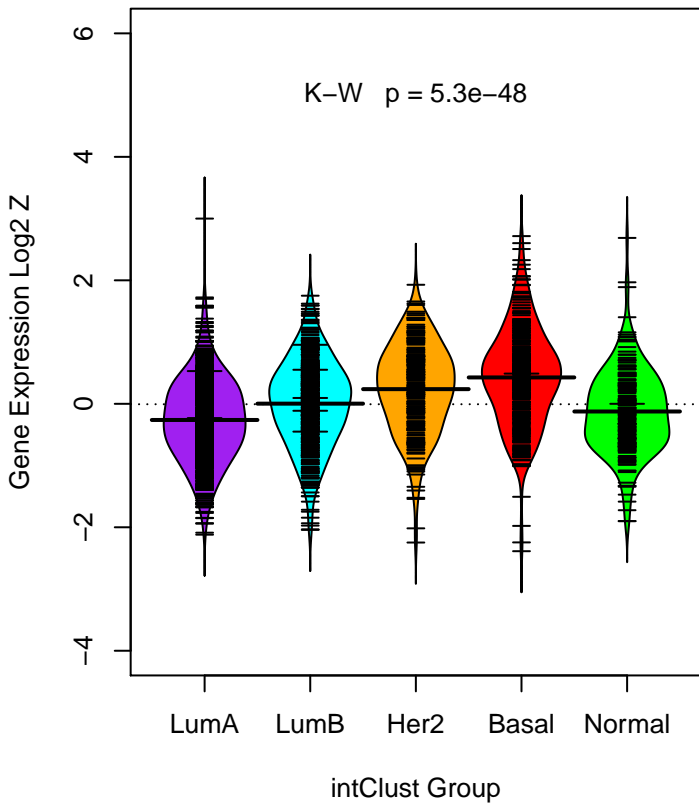

**PDCD1 ( ILMN\_1806725 )**

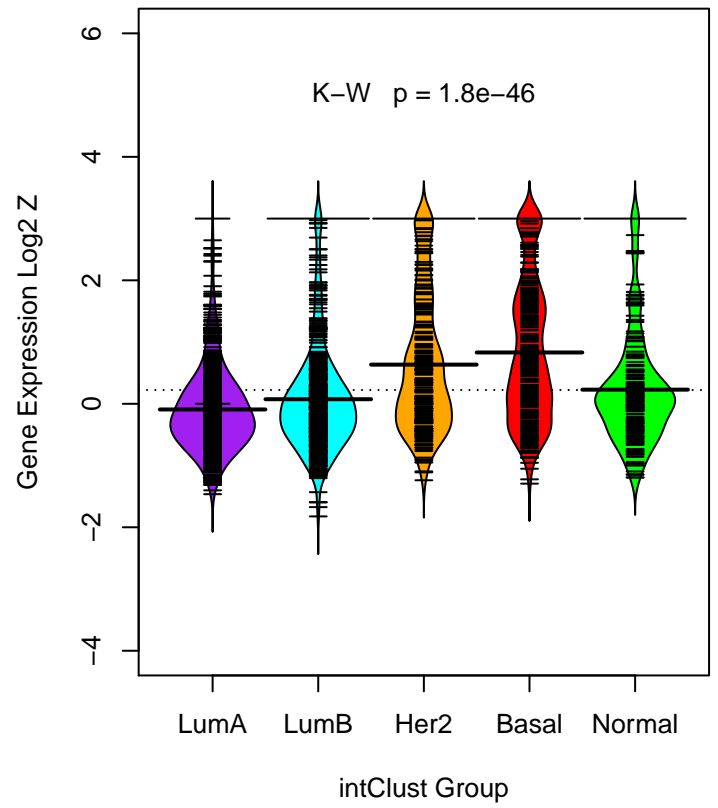

**LTBP3 ( ILMN\_1805395 )**

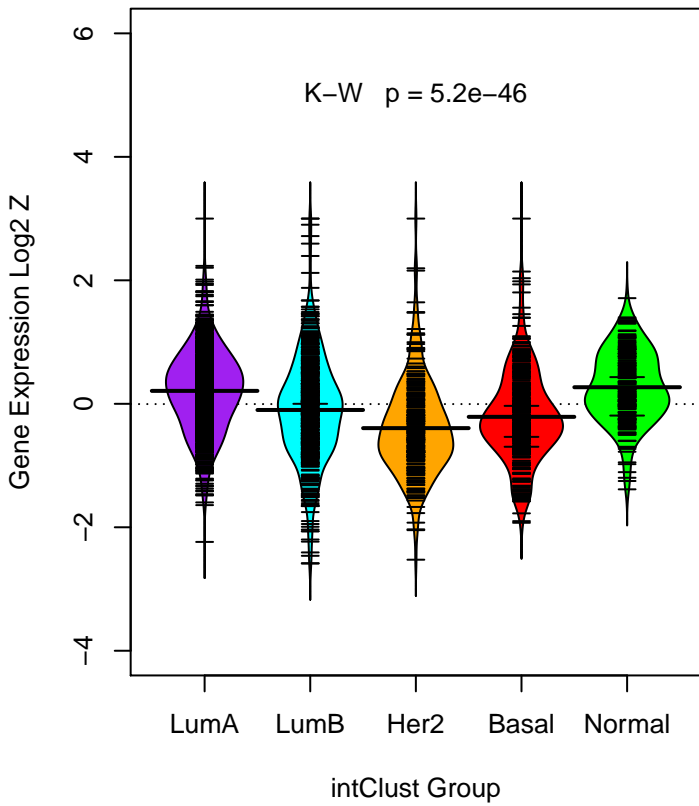

**SEMA3C ( ILMN\_1695475 )**

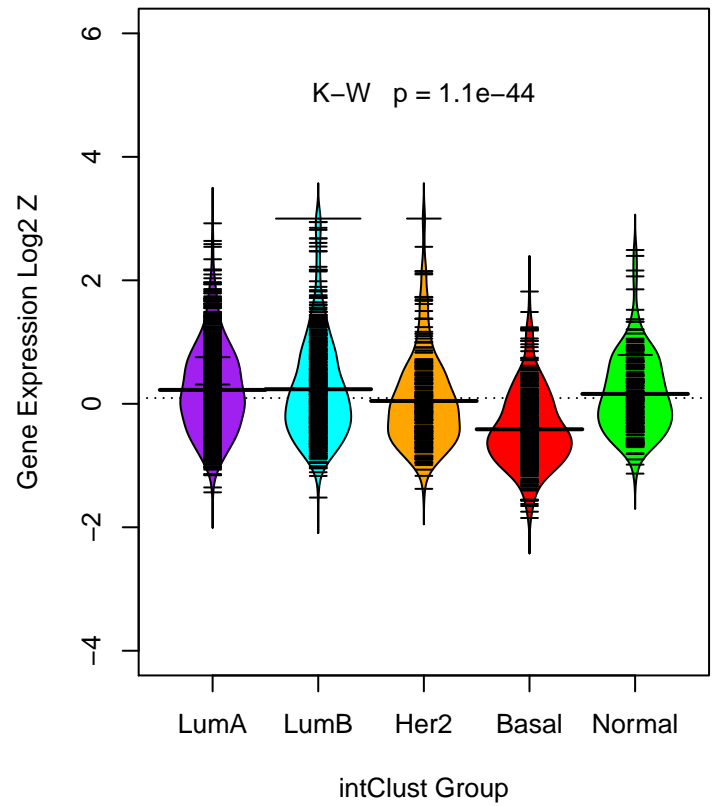

**SAA1 (ILMN\_1701017)**

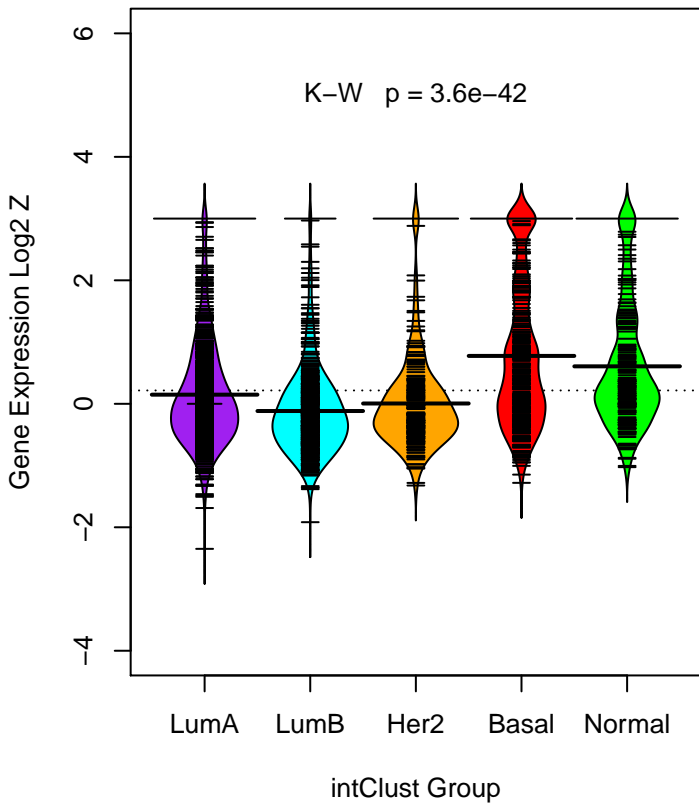

**TUFT1 (ILMN\_1781374)**

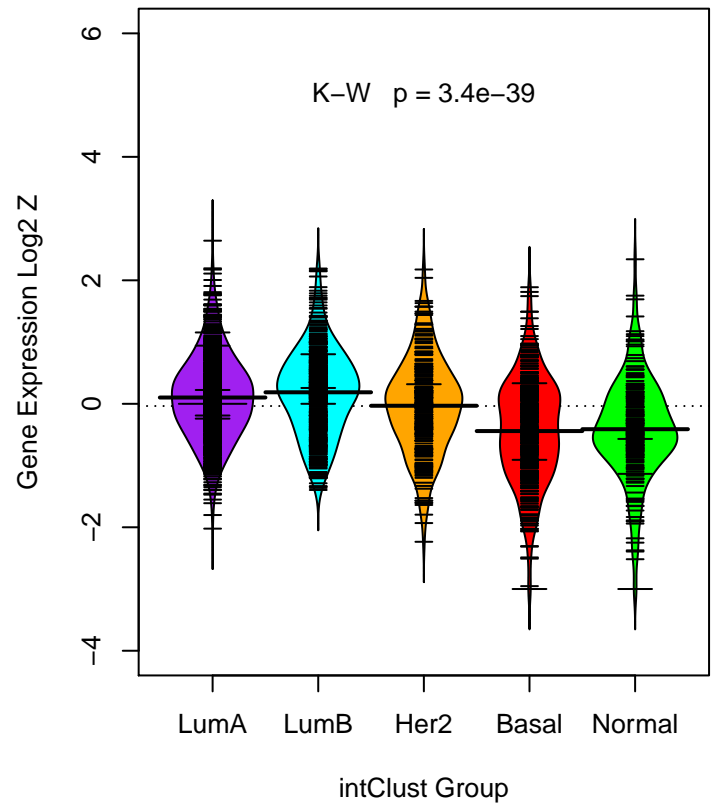

**SCARB2 (ILMN\_1814726)**

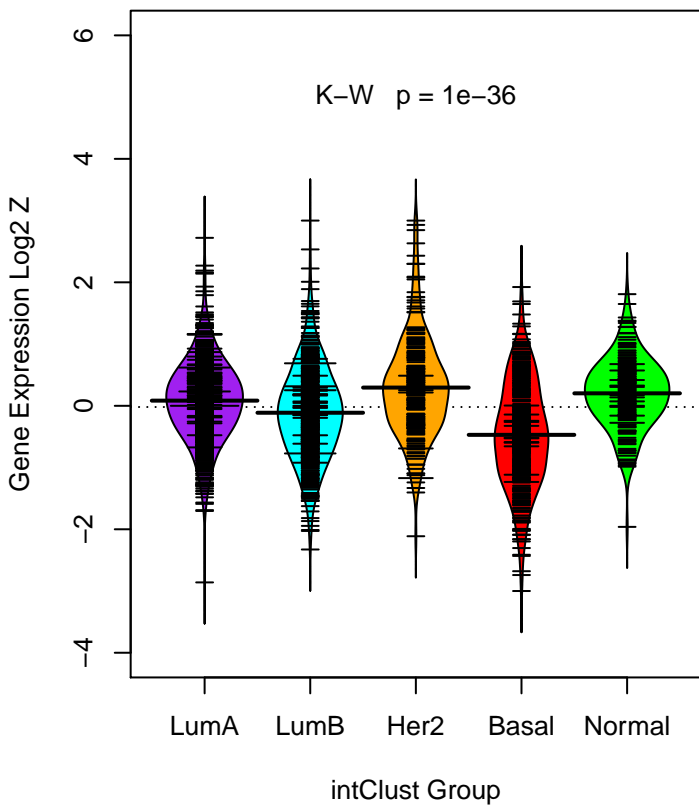

**SLC6A4 (ILMN\_1683694)**

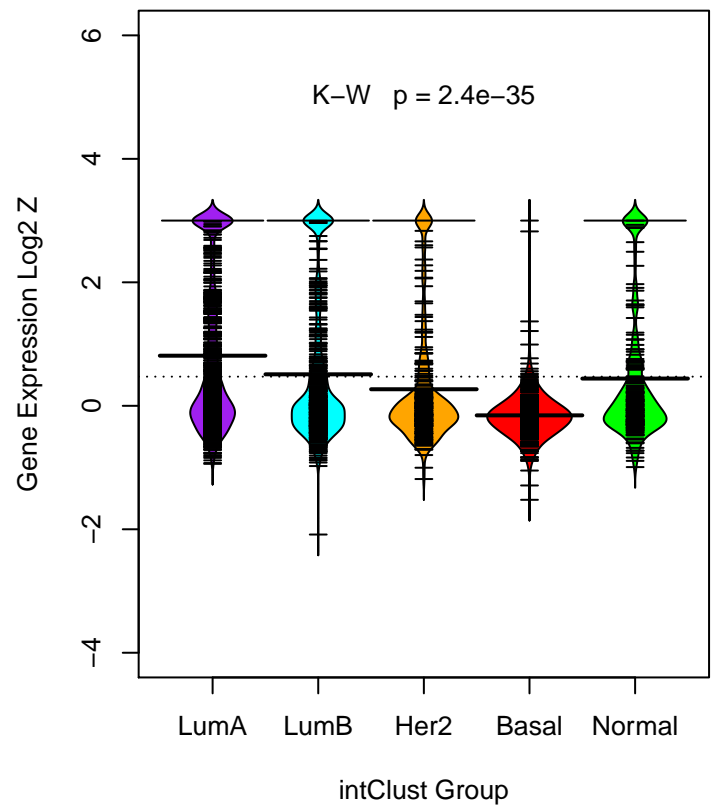

**EFNA4 (ILMN\_1665696)**

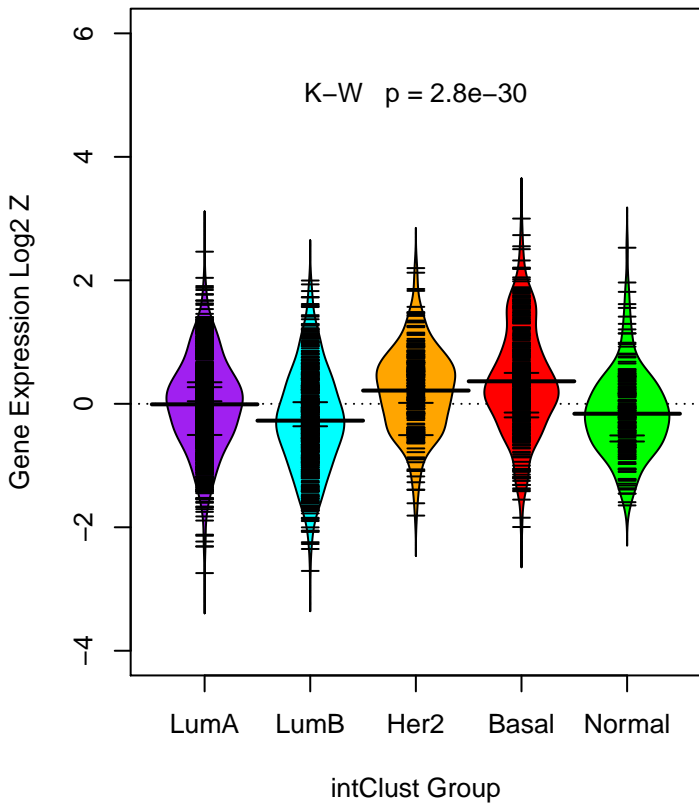

**LPAR3 (ILMN\_1709719)**

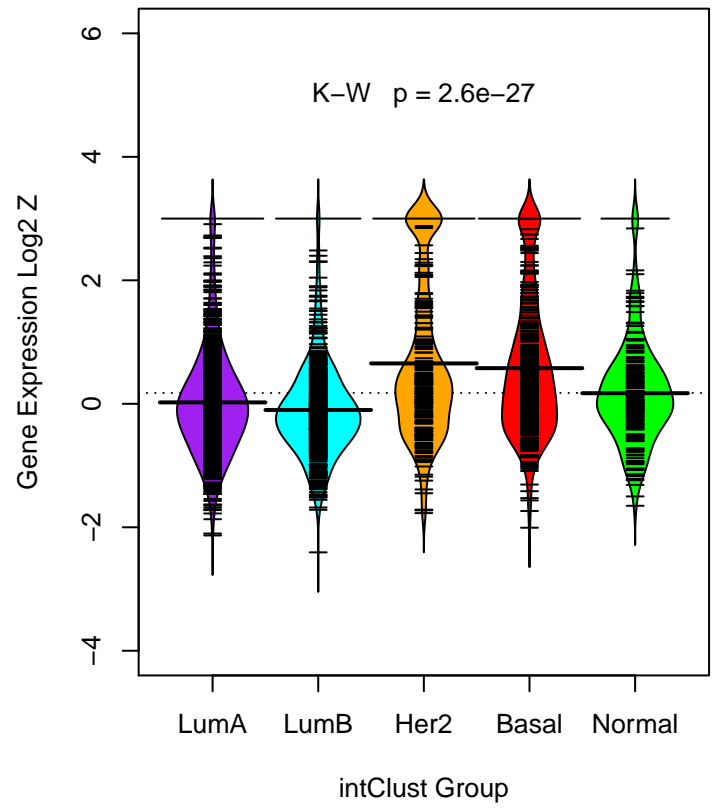

**COL9A3 (ILMN\_1740155)**

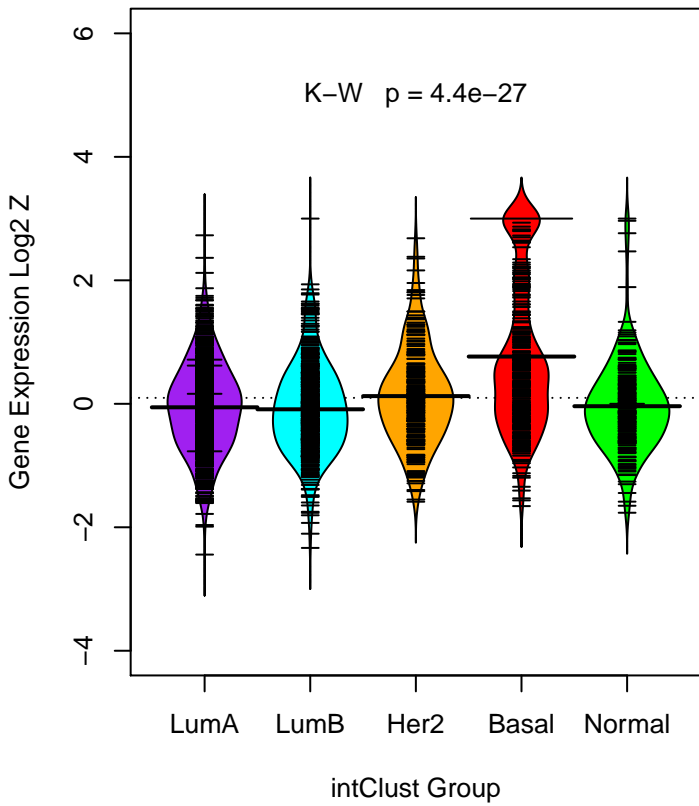

**OPRS1 (ILMN\_1717925)**

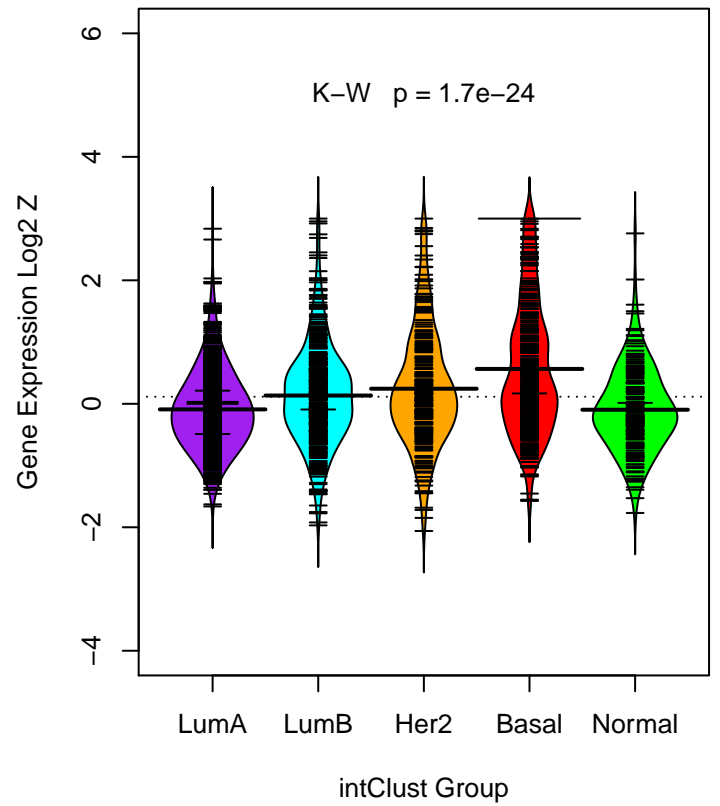

**MMP28 (ILMN\_1752952)**

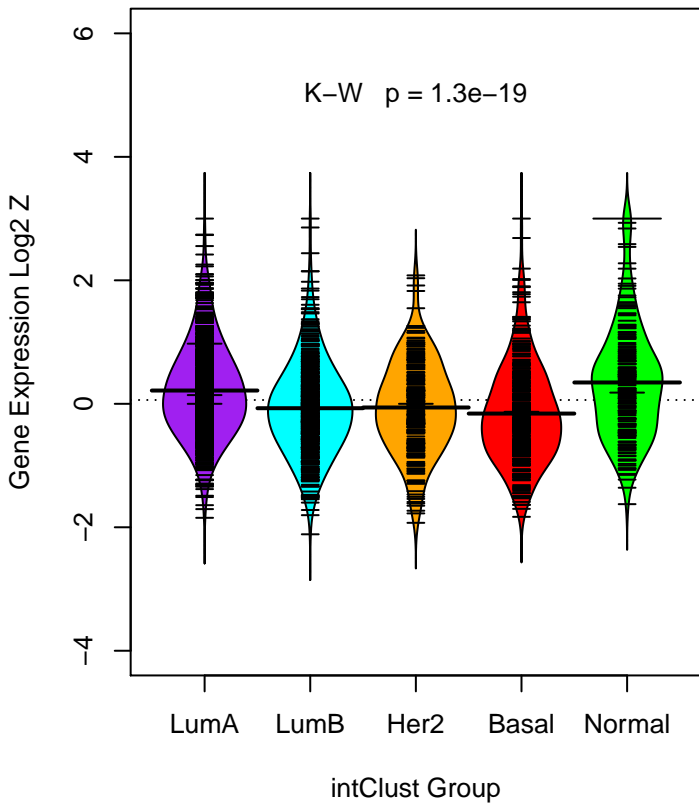

**FIT1 (ILMN\_1764557)**

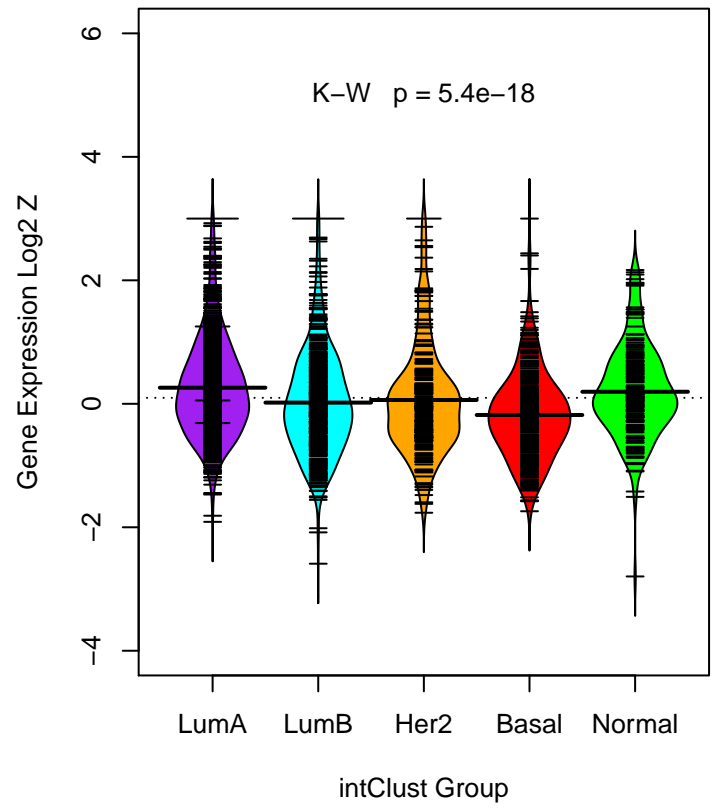

**PROCR (ILMN\_1717262)**

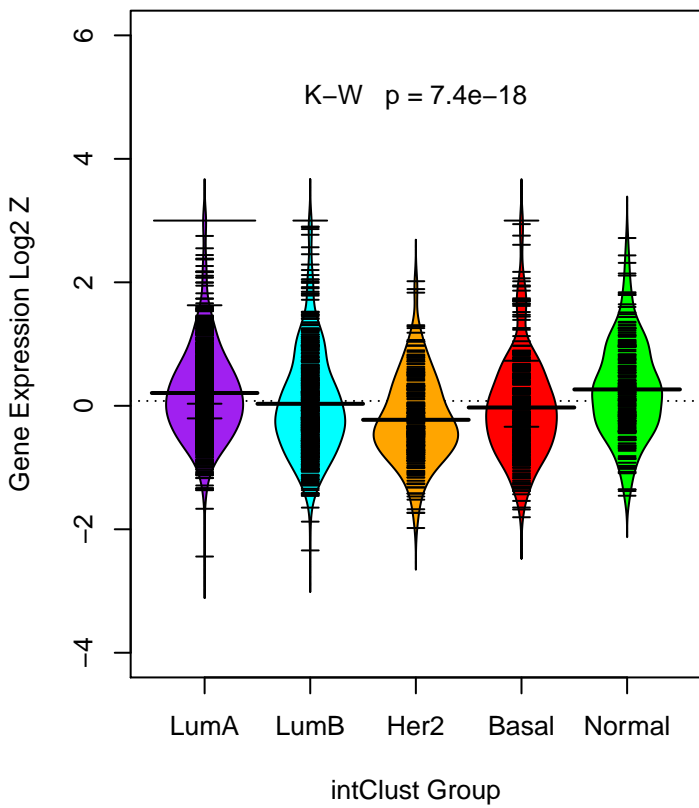

**TMEM14C (ILMN\_1657857)**

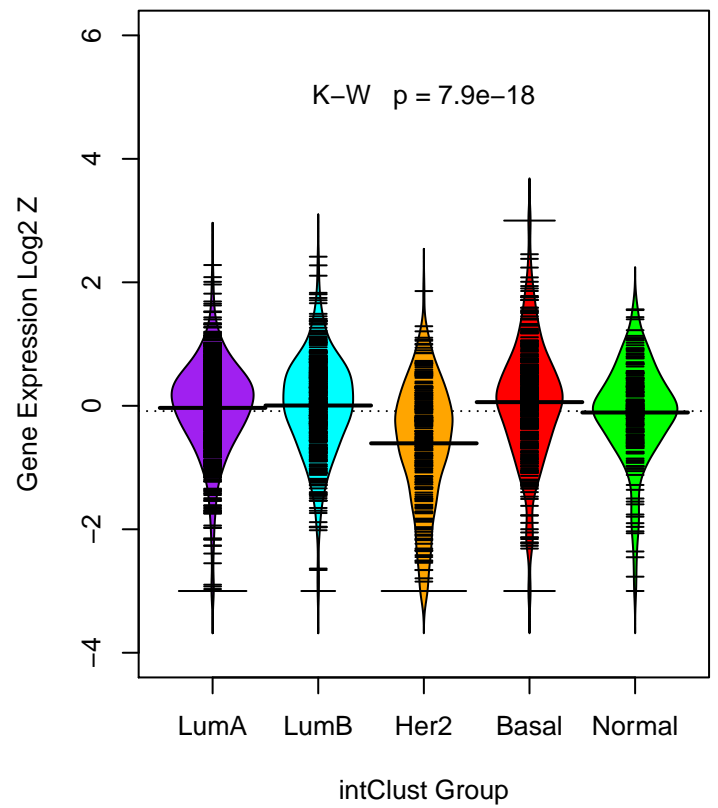

**BDKRB2 (ILMN\_1684086)**

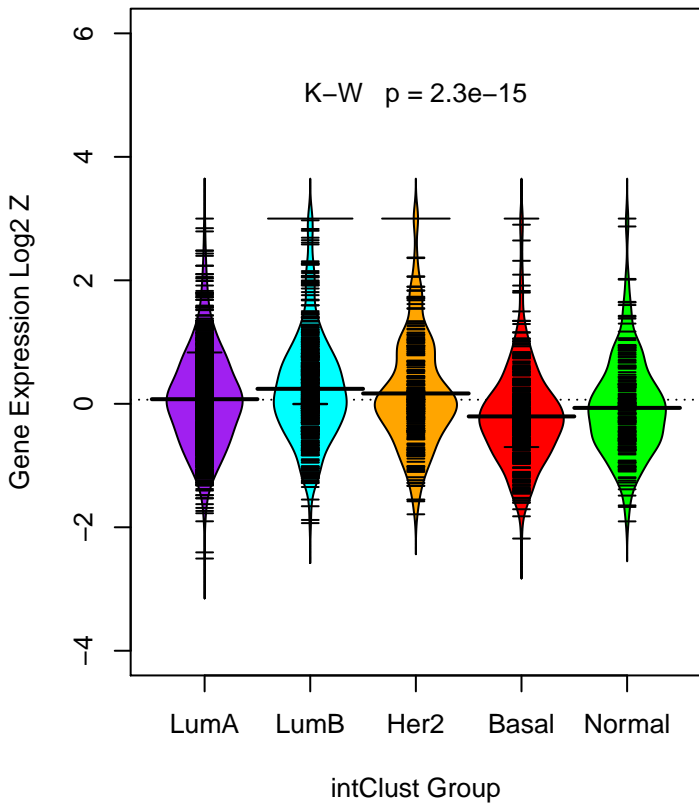

**PCDHB13 (ILMN\_1766950)**

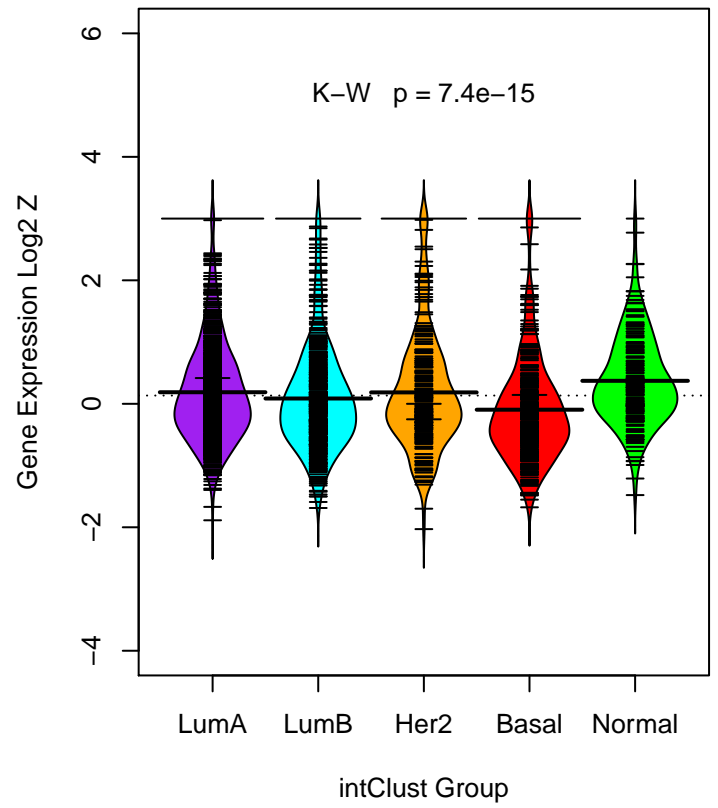

**NPTX1 (ILMN\_1814221)**

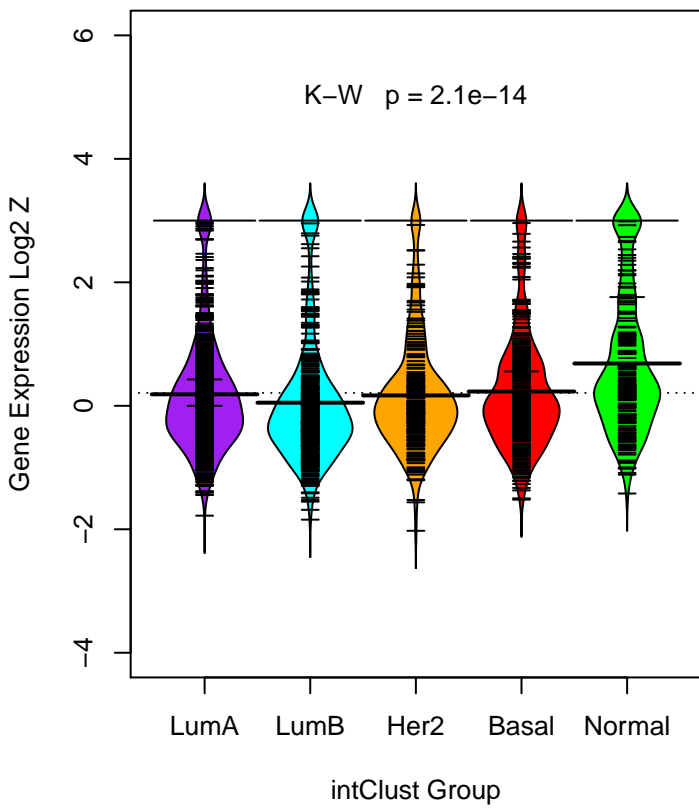

**KTELC1 (ILMN\_1811104)**

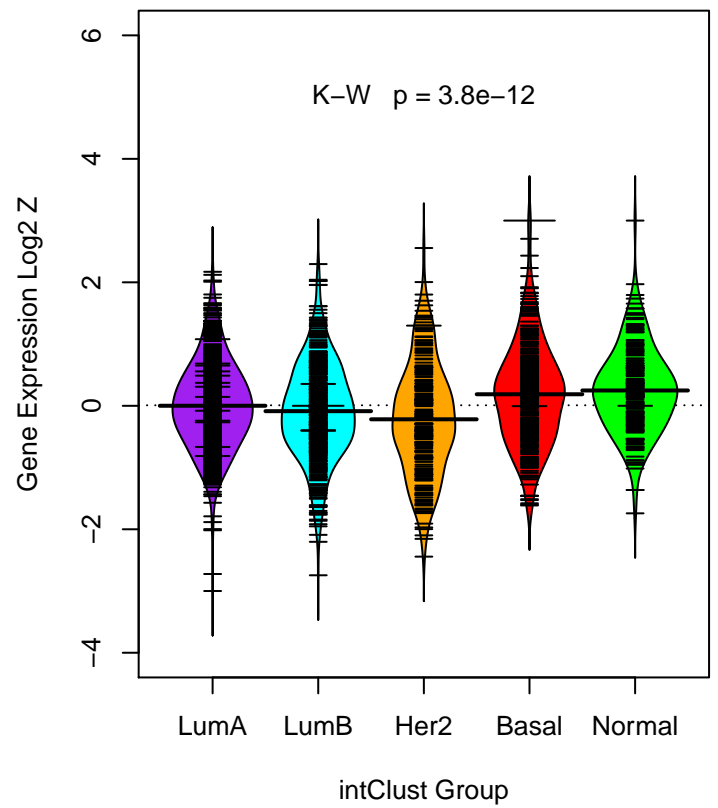

**GPR80 ( ILMN\_2163975 )**

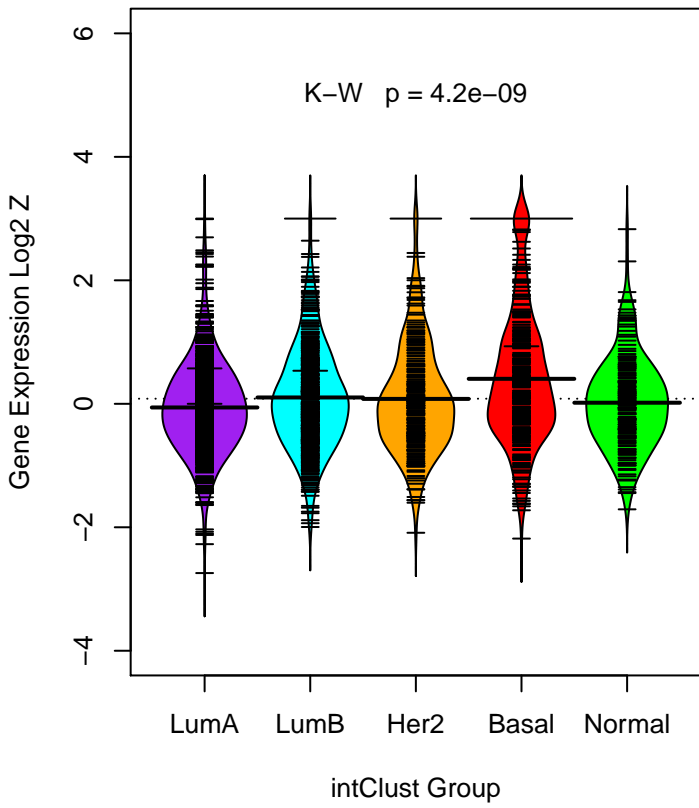

**BST1 ( ILMN\_1770161 )**

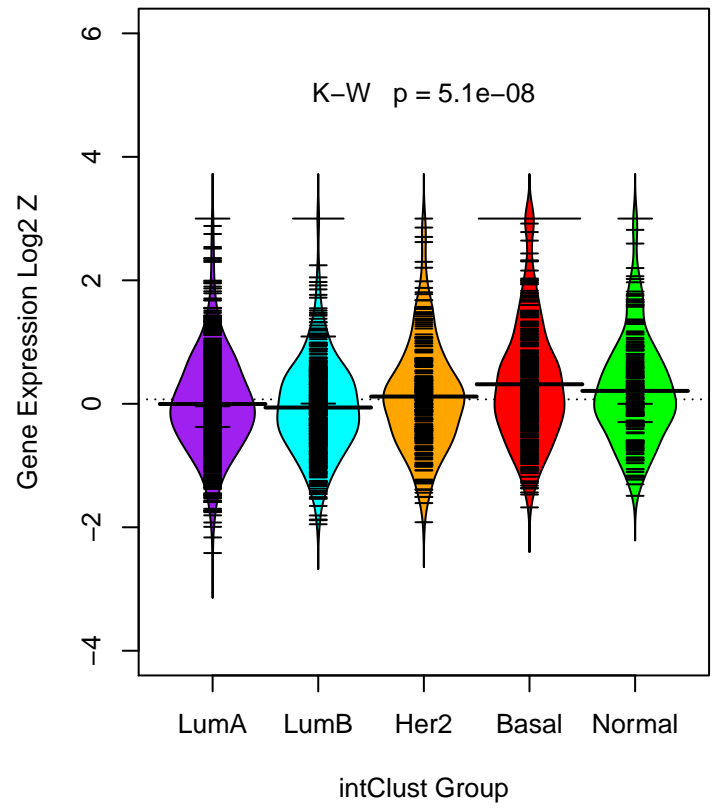

**FLOT2 ( ILMN\_1726222 )**

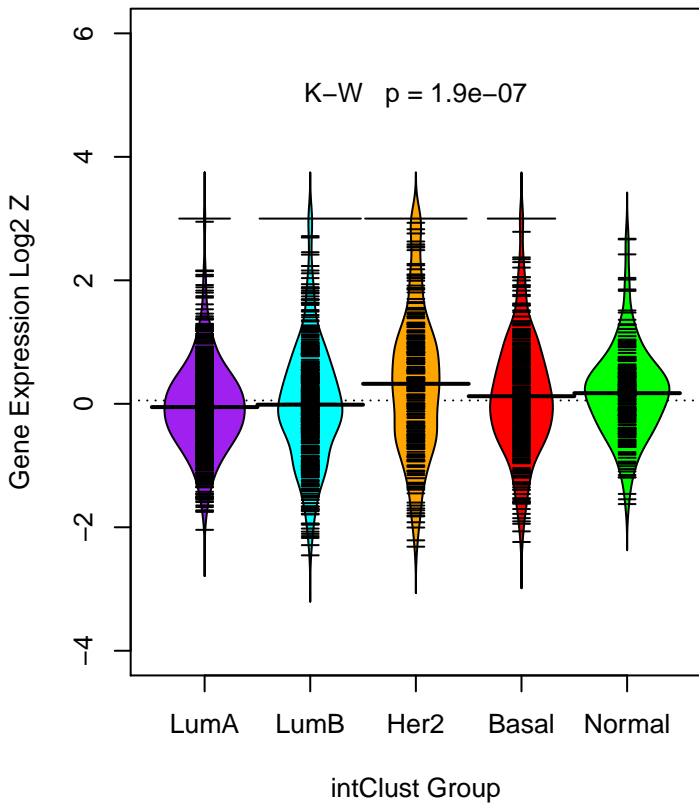

**NTN1 ( ILMN\_1873621 )**

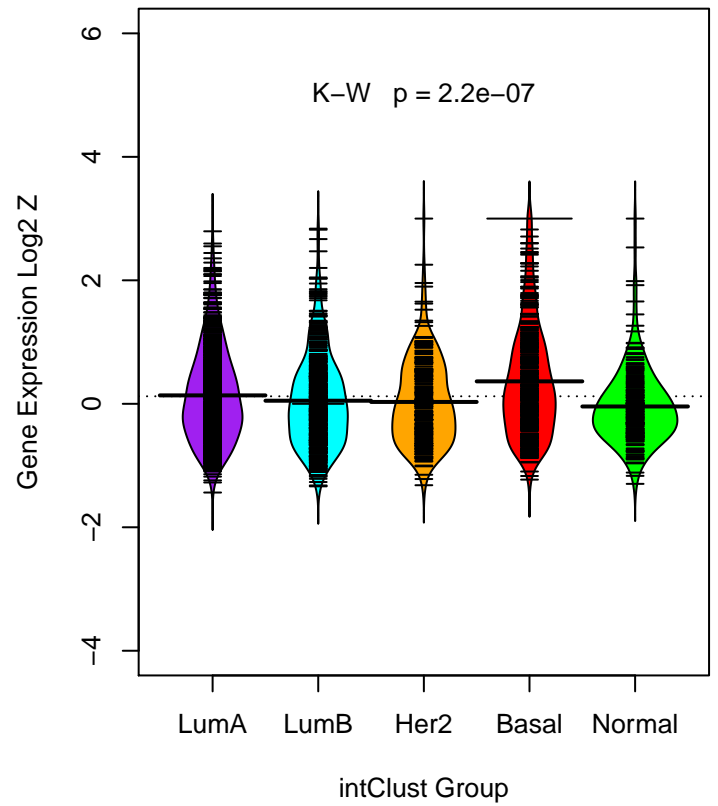



**SNN ( ILMN\_1788251 )**

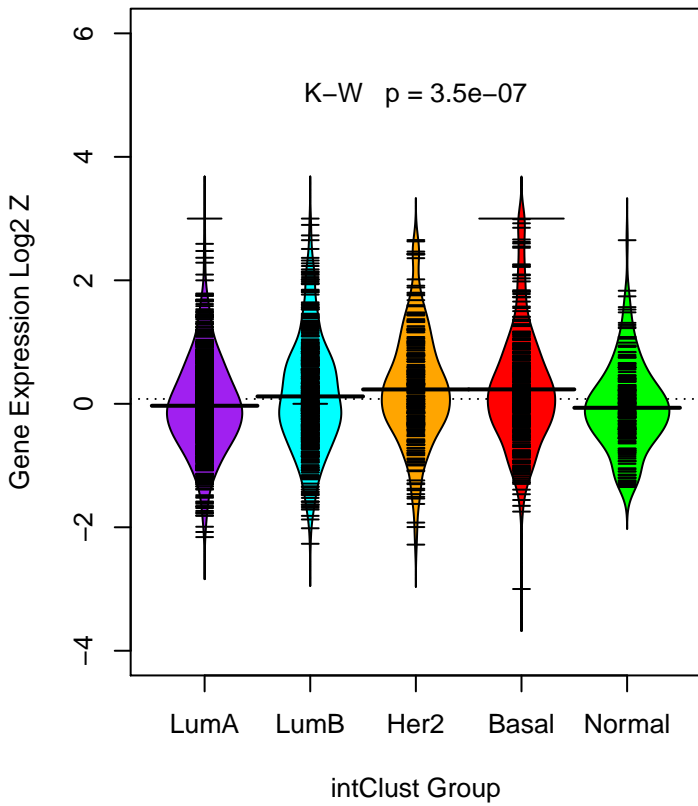

**PARD3 ( ILMN\_1710524 )**

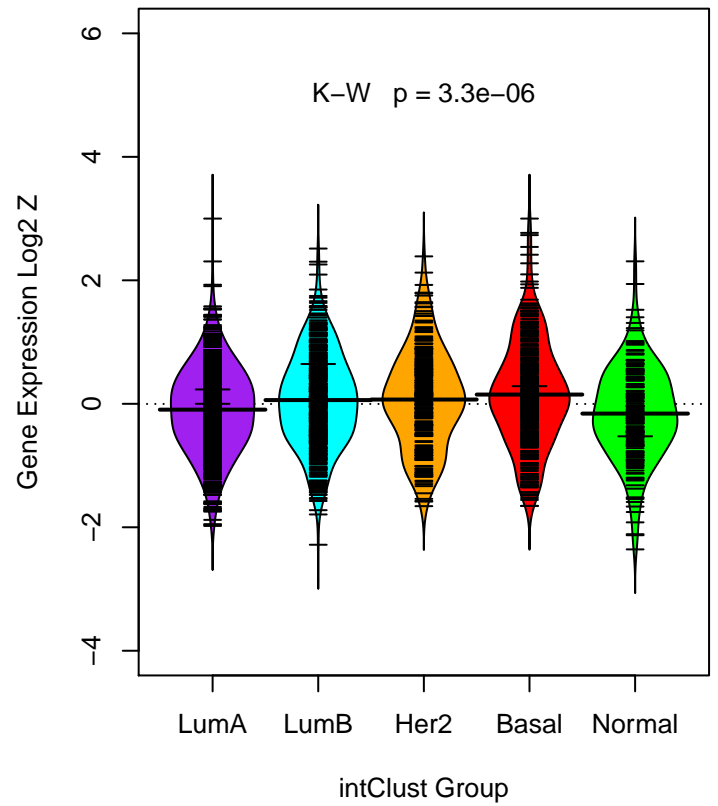

**FZD2 ( ILMN\_1653711 )**

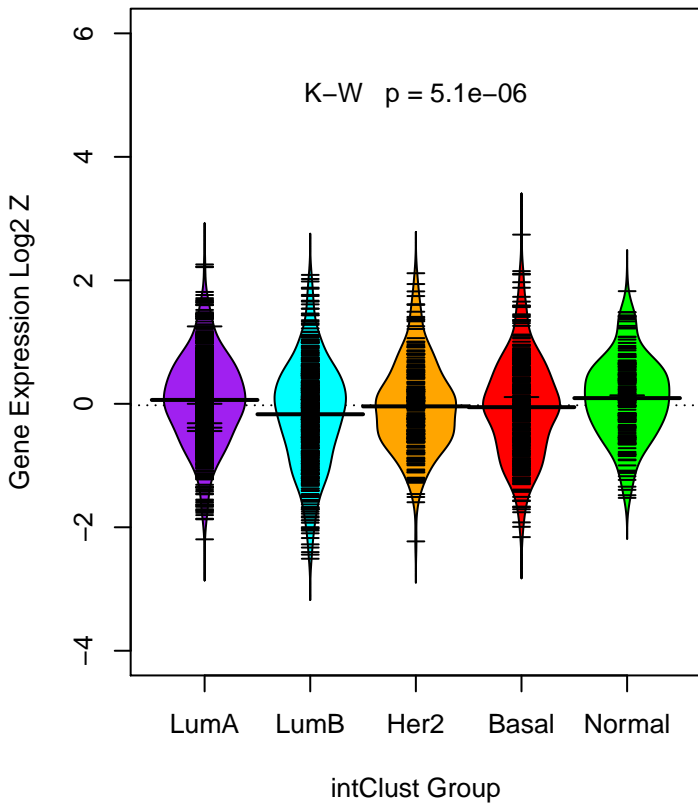

**LGALS1 ( ILMN\_1723978 )**

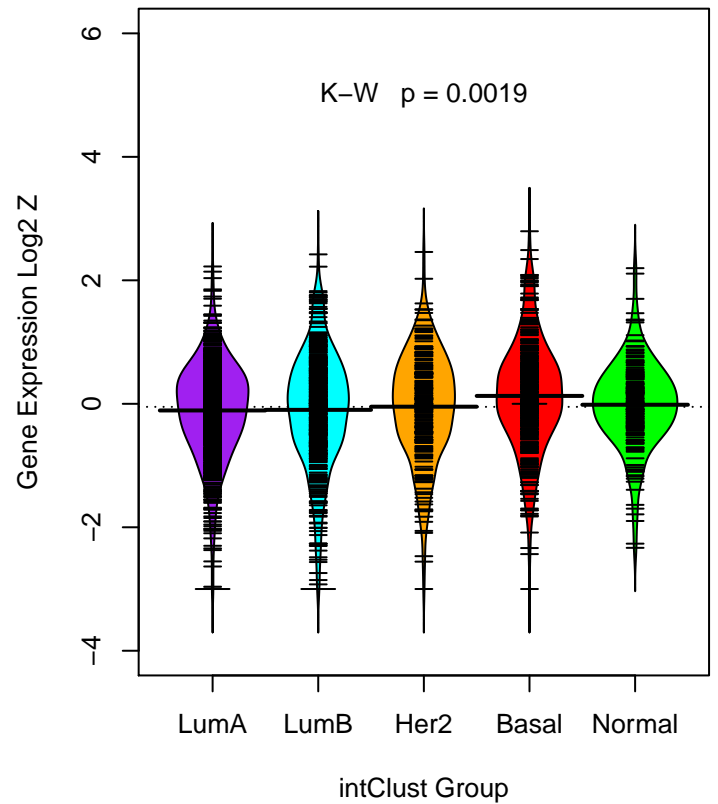

**CD79A ( ILMN\_2410371 )**

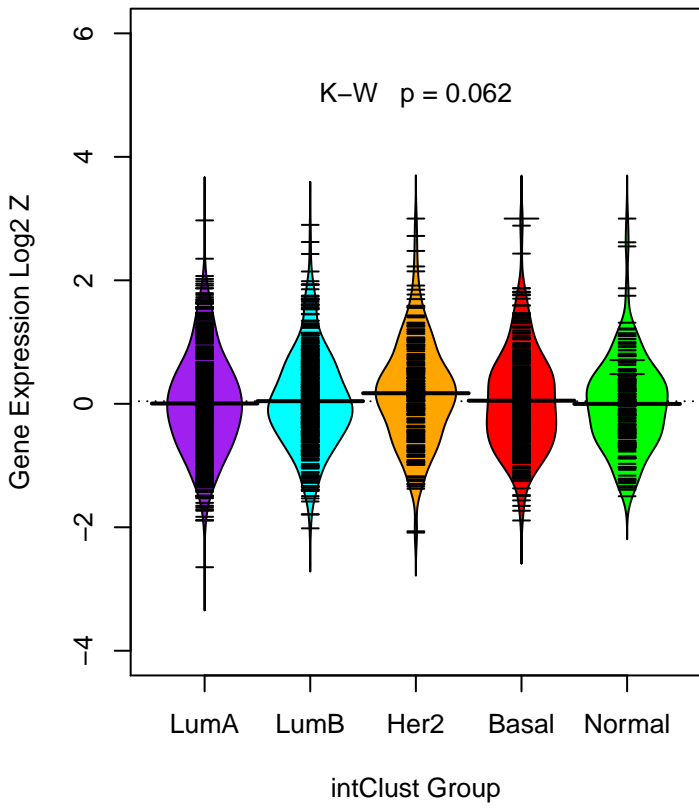

**PLA2G2F ( ILMN\_1724799 )**

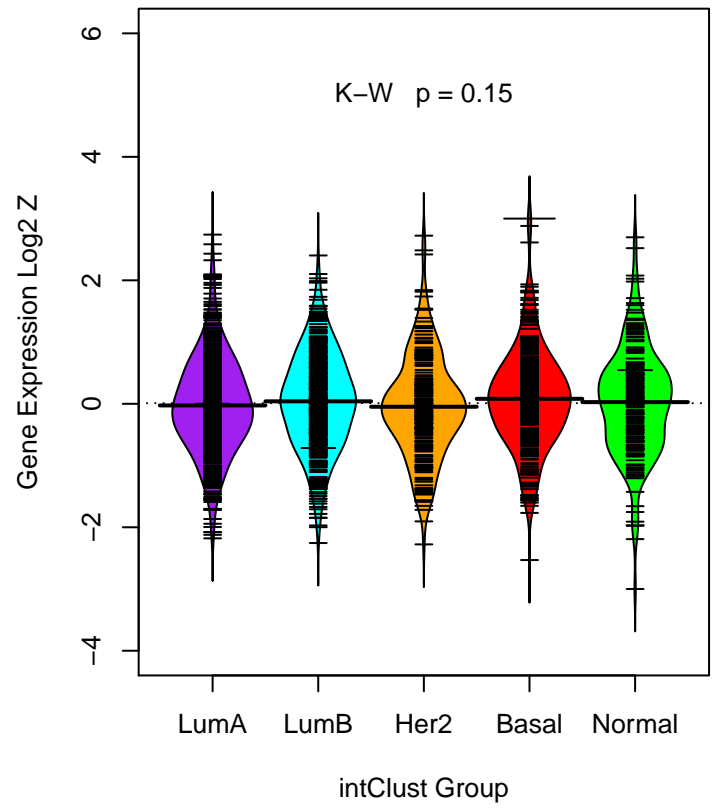

**KCNJ5 ( ILMN\_2137312 )**

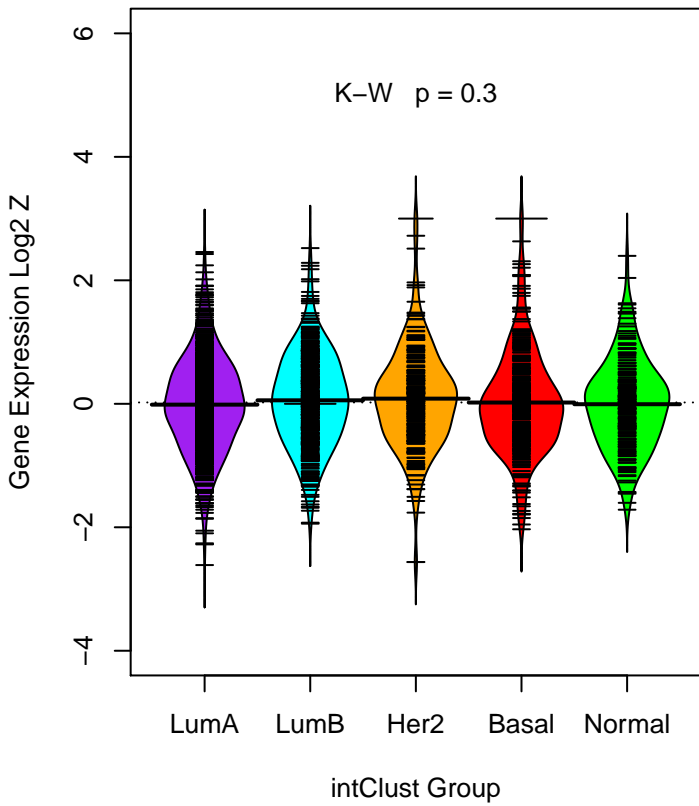

**NTN2L ( ILMN\_1656040 )**

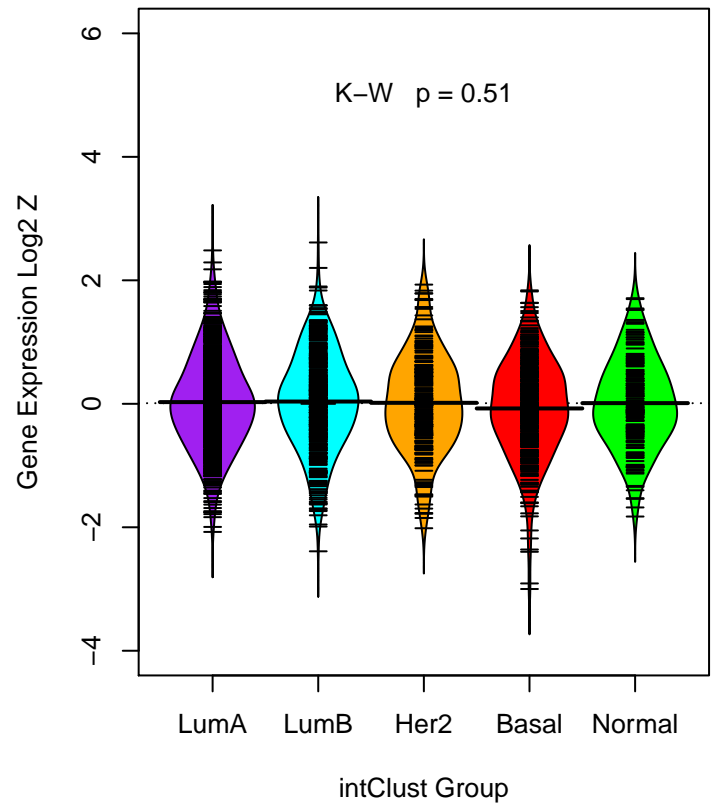

**PLUNC ( ILMN\_1774250 )**

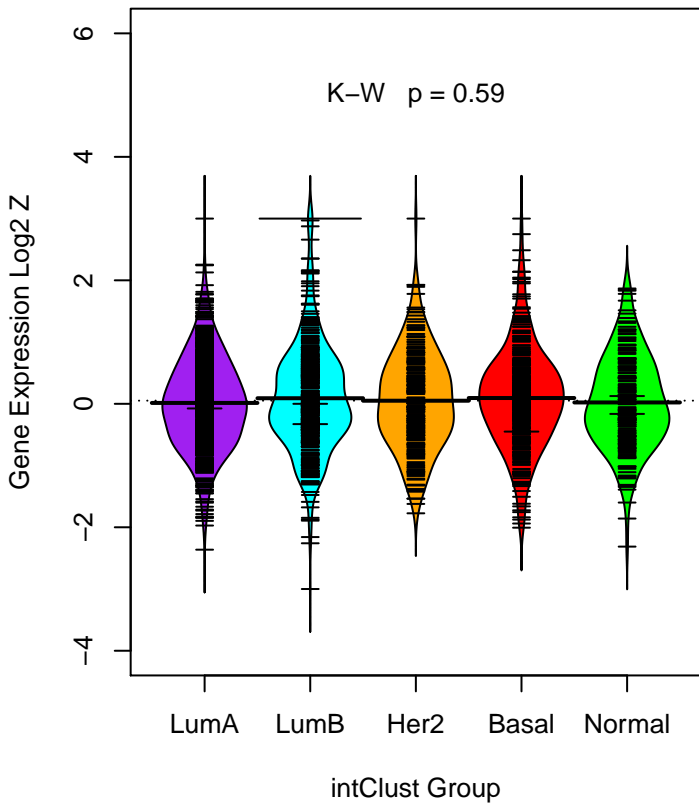

**MMP24 ( ILMN\_1778333 )**

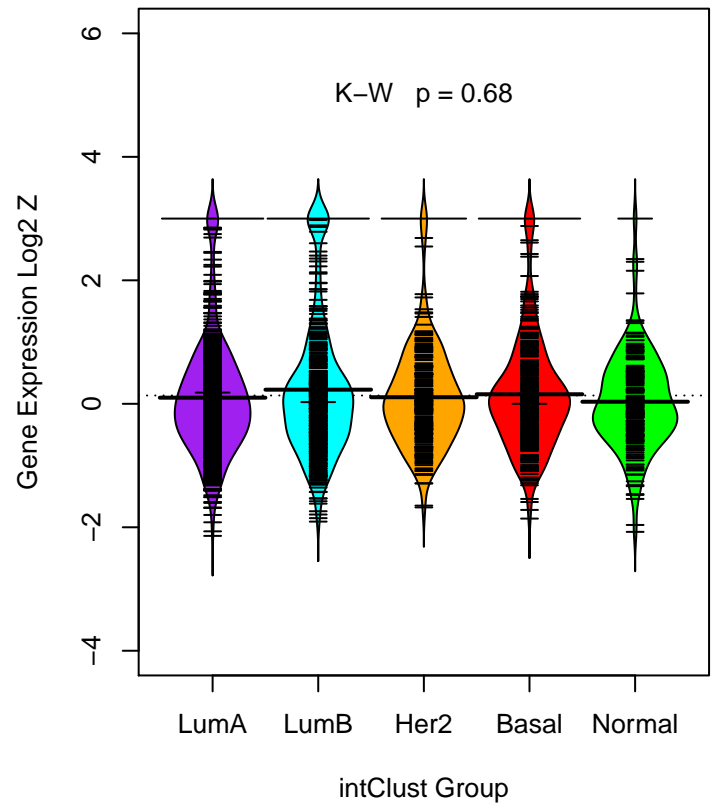

**NKAIN4 ( ILMN\_1813639 )**

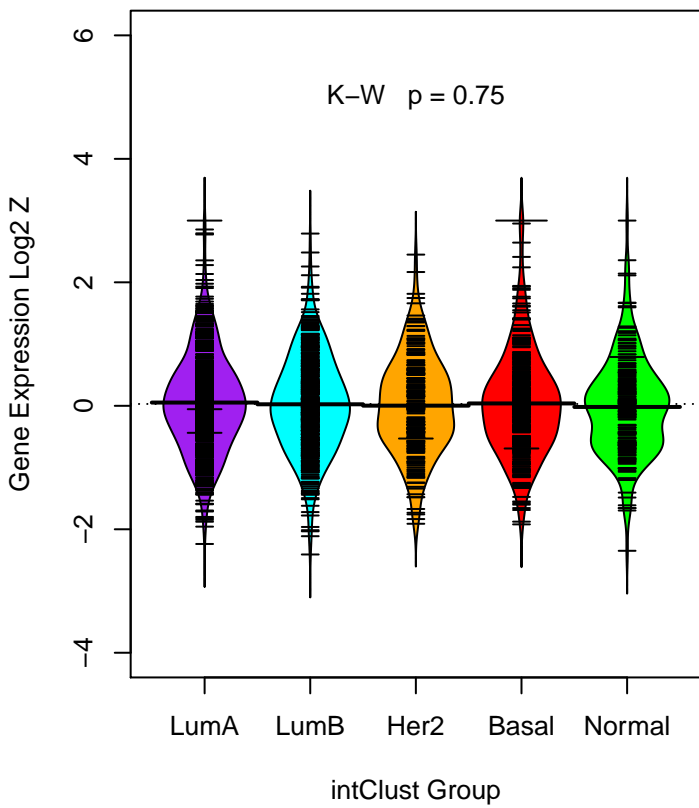

**GPR39 ( ILMN\_1688768 )**

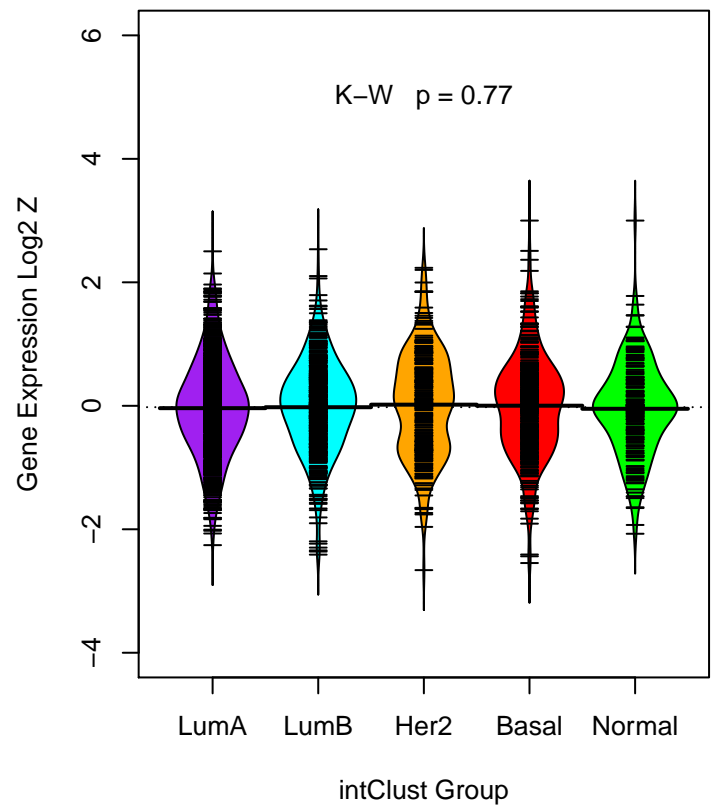

**GPR182 ( ILMN\_1696810 )**

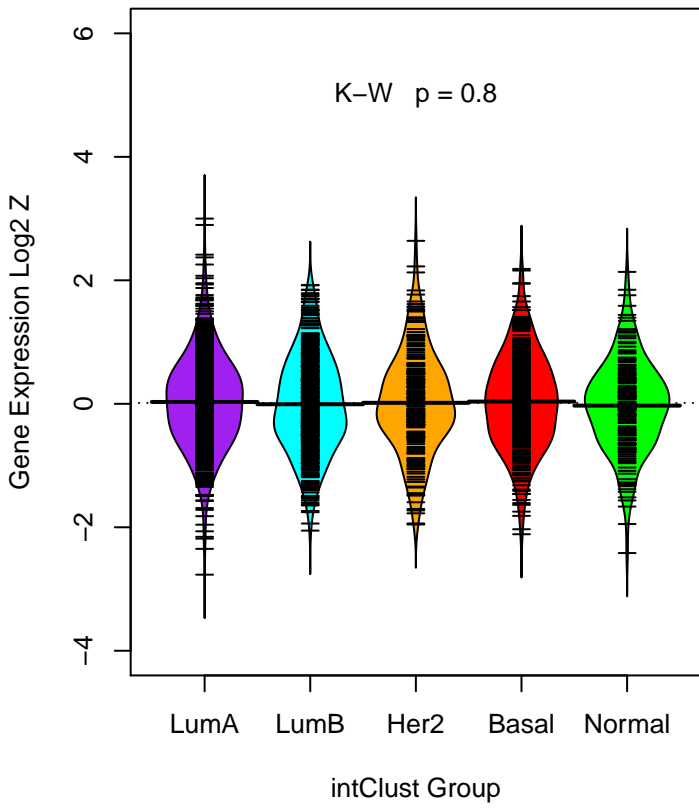

**RHCE ( ILMN\_1770591 )**

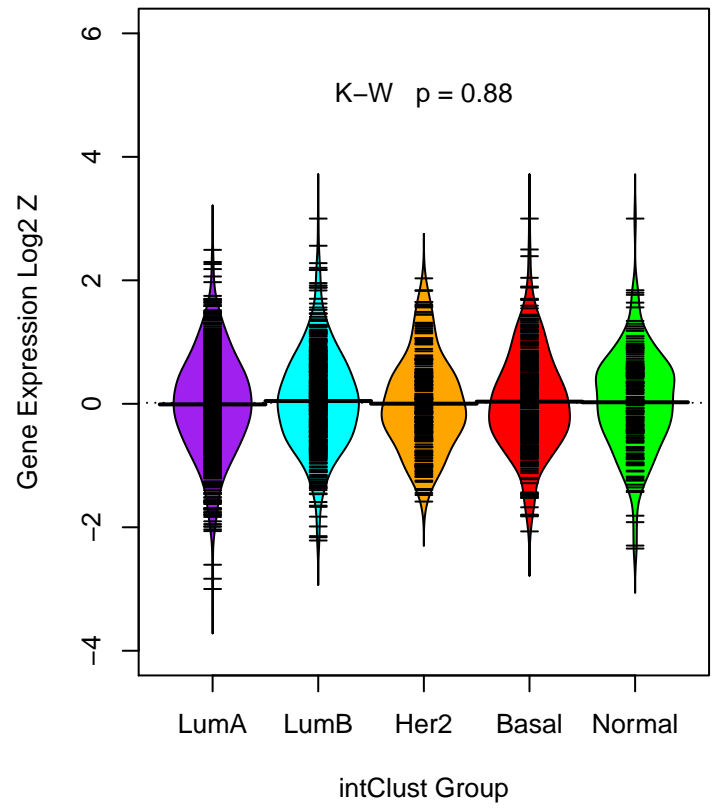

Supplement: MOESM13 [file 9781318]
